# Innate attraction and aversion to odors in locusts

Subhasis Ray\*, Kui Sun, and Mark Stopfer

## Author Affiliation

NICHD, National Institutes of Health, Bethesda, USA

\*Current address: Plaksha University, Punjab, India

Correspondence to be sent to: Mark Stopfer (stopferm@mail.nih.gov)

11

## 12 **Abstract**

13 Many animals display innate preferences for some odors, but the physiological mechanisms  
14 underlying these preferences are poorly understood. Here, with behavioral tests, we establish a  
15 model system well suited to investigating olfactory mechanisms, the locust *Schistocerca*  
16 *americana*. We conducted open field two-choice tests with purely olfactory stimuli. In these tests,  
17 newly hatched locusts navigated toward, and spent time near, the source of a food odor blend,  
18 crushed wheat grass. In similar tests, we found that hatchlings avoided moderate concentrations of  
19 major individual components of the food blend odor, 1-hexanol and hexanal. They were neither  
20 attracted nor repelled by a lower concentration of 1-hexanol, but were moderately attracted to a  
21 low concentration of hexanal. These results establish that hatchlings have a strong, innate  
22 preference for food odor blend, but the valence of the blend's individual components may be  
23 different and may change depending on the concentration. This suggests innate odor preferences  
24 may emerge from more complex processing pathways than labeled lines. Our results provide a  
25 useful entry point for an analysis of physiological mechanisms underlying innate sensory  
26 preferences.

## 27 **Keywords (6)**

28 olfaction, innate valence, food odor, grass odor, foraging behavior, locust hatchling

29

## 30 Introduction

31 Animals are born with some innate sensory and behavioral preferences which develop further with  
32 age and experience. In humans, newborn females are attracted to odors they are exposed to  
33 immediately after birth (Balogh and Porter, 1986), and neonates of both sexes can learn to  
34 associate an artificial odor with their mother in as little as one week (Schleidt and Genzel, 1990).  
35 Rabbit pups, in contrast to humans, receive little maternal care, so their survival after birth depends  
36 on their ability to successfully locate mother's nipple to obtain milk. It has been shown that  
37 newborn rabbits use pheromonal cues for nipple-searching behavior without requiring any  
38 postnatal learning (Hudson, 1985; Schaal et al., 2003). Insects such as locusts, whose eggs are  
39 laid in sand, do not usually hatch in contact with food; nor do they receive any parental care. So,  
40 one might hypothesize these animals must come equipped with innate sensory capacities enabling  
41 them to navigate to food, perhaps, at least in part, by tracking food odors. Most food odors are  
42 conveyed by combinations of volatile chemicals emanating from the food. For example, wheat  
43 grass, which is eagerly eaten by locusts, releases at least 18 different volatiles, with 1-hexanol as  
44 the dominant component (Eissa et al., 2018).

45 Here we investigated the intrinsic preference of newly hatched locusts for a complex food odor by  
46 using a low-cost open field setup to conduct a two-choice behavior test. Monitoring behavior in  
47 locusts in open field settings can be challenging because even newly hatched locusts can jump  
48 and make unpredictable changes in direction. Moreover, their movements can be very intermittent,  
49 requiring lengthy experiments to register their choices. Therefore, we developed a new software  
50 toolkit for recording and tracking multiple animals (Ray and Stopfer, 2022). Using this toolkit, we  
51 recorded and analyzed the movements of hundreds of newly hatched locusts under various  
52 conditions. We found that even without any prior exposure to food, hatchlings could navigate to the  
53 source of a complex food odor blend, wheat grass juice. Notably, while attracted to the complex  
54 food blend, hatchlings were repelled by even low concentrations of the major component of the  
55 blend, 1-hexanol, presented alone. We also found the hatchlings were attracted by low  
56 concentrations of hexanal, which is both a food blend component and an aggregation pheromone  
57 but avoided it at higher concentrations. Thus, our results show that naïve hatchlings are innately  
58 attracted by food odor, that they can navigate to its source, and that individual monomolecular  
59 components of an attractive food odor can change valence depending on concentration.

## 60 Materials and Methods

### 61 Behavior arena

62 The behavior arena (Figure 1) consisted of a clear acrylic tray (30.5 cm x 30.5 cm x 5 cm) with a  
63 non-reflective glass (33 cm x 33 cm, True Vue) cover (Figure 1a). To reduce visual clutter from  
64 reflections, the inner walls of the tray were covered with window film. Air was drawn through the  
65 arena through two nylon mesh-covered slots on opposite walls by a computer fan (Comair Rotron  
66 25 mm x 10 mm 12V DC) powered by a DC adapter with adjustable voltage output. We used a  
67 smoke test to visualize and calibrate the airflow, adjusting the fan's supply voltage to minimize  
68 turbulence, resulting in an air speed of about 0.35 m/s in front of the exhaust slot.

69 The arena was illuminated from below by a tube light placed near the back of the arena. The  
70 bottom of the arena was covered with white paper on the outside, which diffused the light and  
71 created a gradient so the back of the arena was brighter than the front. After entering near the front  
72 of the arena, hatchlings tended to phototax towards the back. A cellphone based light meter  
73 confirmed the left and right sides near the back of the arena were equally bright.

## 74 **Odor delivery**

75 Two 50 ml glass bottles were fitted with airtight silicone plugs pierced by two polyethylene tubes  
76 (Figure 1a). Desiccated, charcoal filtered air flowed into each bottle through one tube and out of  
77 the other tube. These outlets were inserted into the behavior arena through holes drilled on the  
78 airflow-entry wall, opposite from the exhaust fan. Odor and control ports were alternated between  
79 experiments.

## 80 **Odorants**

81 To test responses to a food odor, we used wheat grass grown in our laboratory. Fresh grass was  
82 crushed with a mortar and pestle, and the juice was then pressed through a cell filter mesh. 1 ml  
83 extracted juice was placed as a test odorant in one bottle, and 1 ml deionized water in the other  
84 bottle served as control. Bottles were thoroughly cleaned and dried between trials.

85 To test monomolecular odorants, we used 1-hexanol (Sigma), the dominant component of grass  
86 juice volatiles, and hexanal (Sigma), which is also a significant component of grass juice (Eissa et  
87 al., 2018). These odorants were diluted in mineral oil, and pure mineral oil was used as the control.  
88 All concentrations (see Results) are reported as volume / volume.

## 89 **Odor intensity map in arena**

90 To determine the distribution of odorant within the arena, we used a photo-ionization detector (PID,  
91 Aurora Scientific) to measure odorant intensity in a 5 cm square grid (Figure 1B). 100% 1-hexanol  
92 was delivered through the port on one side as described above, with the glass cover in place. A  
93 polyethylene tube attached to the PID was inserted through the entrance (Figure 1a) and placed at  
94 a grid point, and the PID signal was recorded thrice for 10 s at 20 s intervals. The baseline signal  
95 of the PID was also measured without the odorant. Figures **1b** and **c** show, for odor delivered on  
96 the left and the right respectively, the time-averaged odor signal from the second trial, normalized  
97 by the time-averaged baseline signal  $[(\text{odor} - \text{baseline}) / (\text{max}(\text{odor}) - \text{baseline})]$ . These  
98 measurements confirmed that odorants were laterally distributed, as desired.

## 99 **Behavior experiments**

100 American desert locusts (*Schistocerca americana*) reared in our crowded laboratory colony laid  
101 eggs in sand-filled plastic cups. These egg cups were cleaned of plant and other matter and were  
102 then kept in an incubator at about 29 °C until hatching. Cups with fresh hatchlings were fit with a  
103 plastic test tube through the lid and wrapped with a black cloth (Figure 1d). Locusts tend to climb  
104 upwards (negative geotaxis) and towards light (positive phototaxis). The hatchlings therefore  
105 spontaneously climbed up into the test tube. When 10-20 hatchlings had climbed up, the test tube  
106 was removed and attached to the entrance of the arena from below. The entrance was kept  
107 covered with a small petri dish. To start the experiment, the petri dish was removed, allowing  
108 hatchlings to enter the arena. This procedure eliminated the need to handle the hatchlings before  
109 testing their behavior.

110 To test whether the antennal olfactory system was needed to navigate within the arena, hatchlings  
111 collected in a test tube were anaesthetized by cooling in ice, and then, under a dissection  
112 microscope, both antennae were removed with a pair of sharp micro scissors and fully covered  
113 with wax to maximize sensory elimination. Hatchlings then recovered at room temperature for  
114 about 30 minutes in a test tube before being introduced to the behavior arena as described above.

115 To test whether cooling the hatchlings affected their behavior, animals were cooled in ice as  
116 above, but their antennae were left intact. These hatchlings were also allowed to recover at room

117 temperature for about 30 minutes before they were introduced to the arena.

118 After each trial in the two-choice behavior tests, the inside of the arena was wiped with 70%  
119 ethanol and allowed to dry completely. A new batch of animals was used for each trial.

## 120 Behavior tracking

121 The behavior of the locusts in the arena was recorded by a USB web camera (Logitech Pro Stream  
122 C922x) for 100-minute segments using the Capture utility of the Argos toolkit (Ray and Stopfer,  
123 2022). This utility later processed segments offline, deleting portions in which no movement had  
124 been detected. The reduced videos were then processed by the Argos Tracking tool to  
125 automatically track hatchling movements. To accurately map tracks in all videos to the same  
126 coordinates, the four corners of the arena floor were manually marked in each video, and then  
127 based on these points, the transformation matrix from video coordinates to world coordinates was  
128 computed. The tracks were then transformed by this matrix from video coordinates into world  
129 coordinates. Finally, because the odor and control ports were alternated between trials, they were  
130 brought into the same alignment by flipping the coordinates left-right as necessary.

## 131 Data Analysis

132 All data analysis was carried out by custom scripts written in Python using Python-scipy stack  
133 including the Pandas library.

134 We used t-tests to compare stay times, i.e., the total time a hatchling spent in a Region of Interest  
135 (ROI) and ROI entries (total number of times a hatchling crossed into an ROI) between odor and  
136 control sides. Although none of the differences were normally distributed (confirmed by Shapiro-  
137 Wilk tests), the use of t-tests was appropriate because  $n > 30$  for all comparisons, and thus the  
138 central limit theorem could be applied. We also conducted nonparametric Wilcoxon signed rank  
139 tests which produced p values (not shown) supporting the same conclusions reported here.

140 To compare attraction toward the test odor port and the control port over time we used the lifelines  
141 module in Python for survival analysis with Kaplan-Meier fit. The Kaplan-Meier curve is a step  
142 function indicating the probability of “survival,” i.e. the probability that an event of interest has not  
143 yet occurred. In the experiments comparing attraction towards grass juice odor and control, we  
144 computed, for each hatchling, the interval between first detecting the hatchling in the arena and its  
145 first entrance to the ROI around the odor port. We used these intervals to make a survival plot, with  
146 the entry into the ROI as the event of interest (orange line). Animals which did not enter the ROI  
147 within the experiment duration of 100 minutes were “censored.” Similarly, the first entry into the  
148 ROI around the control port was the event of interest for control, and the time interval from first  
149 detecting the hatchling until this event was used in the Kaplan-Meier fit (blue line). The log-rank  
150 test was used to compare these curves. Note that here we are comparing the first entry into the  
151 odor ROI with that into the control ROI, and they are not mutually exclusive; if a hatchling visited  
152 both ROIs, then it is included in both curves with the corresponding time intervals.

## 153 Results

### 154 Naïve locusts are attracted to food odor

155 To determine whether locusts are innately attracted to food odor, we conducted a two-choice test  
156 between grass juice odor and water vapor. We used newly hatched locusts that had no prior  
157 exposure to food or food odors (see Materials and Methods). In this first instar stage the hatchlings  
158 have not yet developed wings and move by walking or jumping. Figure 2A shows overlaid tracks

159 from all hatchlings in all experiments. Track color in these images was set to change from dark  
160 purple to blue to green to yellow over time, showing that many hatchlings moved directly towards  
161 the source of grass juice odor after entering the arena. To quantify the affinity of the hatchlings for  
162 the food odor, we computed the amount of time they spent in a semicircular region of interest (ROI)  
163 of 4 cm radius around each port. Hatchlings spent significantly more time near the odor port than  
164 the control port (Figure 2b; paired t-test,  $n=213$ ,  $p=6.44e-11$ ). We also found the hatchlings  
165 crossed into the food odor port ROI significantly more times than into the control port ROI (Figure  
166 2c, paired t-test,  $n=213$ ,  $p=1.16e-6$ ), indicating that they returned to the food odor source again and  
167 again while exploring the arena. We computed a preference index (PI) based on total stay time in  
168 the ROIs as  $(\sum t_{\text{Odor}} - \sum t_{\text{Control}}) / (\sum t_{\text{Odor}} + \sum t_{\text{Control}})$ , for sums over the entire population, of  $PI = 0.41$ .  
169 We also computed a PI for the number of ROI entries using the same formula, replacing time  $t$  with  
170 the number of ROI entries  $n$ , and this yielded  $PI = 0.32$ . Both PIs indicate the hatchlings move  
171 preferentially toward grass juice odor.

172 Finally, we applied a survival analysis using the Kaplan-Meier (KM) method to determine the rates  
173 at which hatchlings moved toward odor or control ports (log-rank test statistic=20.17,  $p < 0.005$ ,  
174 see Methods). In this statistic, hatchlings are removed from the “survival” pool when they first enter  
175 either ROI, so survival curves shown in Figure 2d indicate the time it took for each hatchling to  
176 choose. The KM plots show hatchlings entered the food odor ROI significantly faster than the  
177 control ROI. Also, the slope of the curve for the odor is steeper at the beginning, indicating that the  
178 hatchlings tend to move quickly towards the odor port upon entering the arena. Because no visual  
179 or other cues distinguished the source of the food odor from that of the control, this result  
180 establishes that hatchlings could use odor guided navigation to reach the source of an attractive  
181 food blend odor.

## 182 **Attraction to food odor is mediated by antennae**

183 Antennae are the main olfactory organs in insects, but locusts also have odorant receptors on their  
184 mouth parts (Keil, 1999). To test whether the antennal olfactory pathway was necessary for the  
185 hatchlings' innate attraction toward food odor, we conducted behavioral experiments identical to  
186 those described above but with hatchlings whose antennae had been removed while they were  
187 anesthetized by cooling (see Materials and Methods). We found hatchlings lacking antennae were  
188 equally attracted to food odor and control ports (Figure 3a-c; two-tailed paired t-test, for stay time  $n$   
189 = 35,  $p = 0.44$ ,  $PI = -0.10$ , and for number of ROI entries  $n=35$ ,  $p= 0.57$ ,  $PI=0.07$ ). We noted that  
190 these hatchlings tended to follow circular paths while heading toward the back of the arena,  
191 possibly drawn there by the brighter light or by air movements; earlier experiments with other  
192 insects where a single antenna was cut did not produce circling behavior (Schultheiss et al., 2020).

193 To test for possible effects of anesthesia by cooling, we also conducted control experiments in  
194 which hatchlings were cooled over ice, but their antennae were left intact. These animals, after  
195 recovering at room temperature, were, by most measures, significantly attracted towards food odor  
196 (Figure 3d-f; paired t-test, for stay-time  $n = 59$ ,  $p=0.08$ ,  $PI = 0.26$ , and for the number of ROI  
197 entries  $n = 59$ ,  $p = 0.002$ ,  $PI = 0.38$ ).

198 Together, these results indicate that the antennal olfactory pathway primarily mediates the  
199 hatchlings' naïve attraction toward food odor.

200

## 201 **Naïve hatchlings avoid a single component of food odor blend**

202 We next asked whether single components of grass odor attract the hatchlings. The major



203 monomolecular volatile released by wheat grass is 1-hexanol (Eissa et al., 2018). Humans  
204 perceive this chemical as smelling like freshly cut grass. Also, electrophysiological experiments  
205 have shown this odorant evokes strong neural activity in many projection neurons in the locust  
206 antennal lobes (Stopfer et al., 2003). We therefore conducted two-choice tests as above but  
207 replaced the food blend odorant with 1-hexanol diluted in mineral oil (1% v/v), tested against pure  
208 mineral oil. Notably, the hatchlings were not attracted to 1-hexanol, and instead showed a  
209 significant tendency to avoid it (Figure 4a): hatchlings spent significantly less time within the ROI  
210 around the odor port than the control port (Figure 4b, paired t-test:  $n=123$ ,  $p=3.96e-4$ ,  $PI=-0.38$ ),  
211 and made fewer entries to the odor port than the control port (Figure 4c, paired t-test:  $n = 123$ ,  
212  $p=9.05e-5$ ,  $PI= -0.54$ ).

213 Animals are often repelled by strong odors (Laing et al., 1978; Semmelhack and Wang, 2009), so  
214 we next reduced the concentration of 1-hexanol in the odor bottle by an order of magnitude (0.1%  
215 v/v). However, this concentration of 1-hexanol elicited neither attraction nor repulsion from  
216 hatchlings, which showed no difference in affinity for the odorant or the control (Figure 4d-f). In this  
217 case the PI for stay time was -0.02 and that for the number of ROI entries was -0.06. Two-tailed  
218 paired t-tests showed no differences ( $n = 87$ ,  $p = 0.86$  for stay time;  $n = 87$ ,  $p = 0.60$  for number of  
219 ROI entries). Together, these results indicate hatchlings were not attracted by 1-hexanol alone.

## 220 **Attraction to an aggregate pheromone depends on its** 221 **concentration**

222 Another major component of wheat grass juice is hexanal (Eissa et al., 2018), which has also been  
223 identified as a component of the aggregation pheromone blend in a closely related locust species,  
224 *Schistocerca gregaria* (Torto et al., 1996). We found dilute hexanal in the odor bottle (0.9% v/v in  
225 mineral oil) repelled hatchlings (Figure 5 a-c;  $n = 115$ , paired t-test,  $p = 2.93e-4$ ,  $PI = -0.27$  for stay-  
226 time and  $p = 1.80e-4$ ,  $PI = -0.34$  for number of ROI entries). Notably, further diluted hexanal  
227 (0.225% v/v) attracted hatchlings as suggested by significantly longer stay times near its outlet  
228 (Figure 5d-f;  $n = 95$ , paired t-test,  $p = 0.038$  and  $PI = 0.14$ ), though the difference in the number of  
229 entries into ROI fell short of statistical significance despite showing a positive preference index ( $p =$   
230  $0.15$ ,  $PI = 0.21$ ). Together, these results demonstrate that even an ethologically important  
231 attractive odor can have the opposite valence when presented at relatively high concentrations.

## 232 **Control for mineral oil**

233 Finally, to test whether possible odors from the mineral oil used as control in these experiments  
234 may have affected the movements of hatchlings, we repeated the 2-choice test with air passing  
235 through a clean, empty bottle tested against air passing through a bottle containing mineral oil.  
236 Hatchlings showed no preference for either choice in these experiments in terms of stay time ( $n =$   
237  $81$ , with two-sided paired t-test  $p = 0.31$ ;  $PI = 0.10$ ), or the number of ROI entries ( $n = 81$ , with two-  
238 sided paired t-test  $p = 0.29$ ;  $PI = 0.09$ ) (Figure 6a-c), indicating the hatchlings were neither  
239 attracted nor repelled by mineral oil.

## 240 **Discussion**

241 Here we found naïve, newly hatched locusts show an innate attraction toward the odor of wheat  
242 grass, a plant readily consumed by locusts of all ages. We also found that hatchlings require their  
243 antennae to navigate towards the odor source. What mechanism could explain this innate  
244 attraction? One possibility is hatchlings overexpress olfactory receptors sensitive to plant volatiles,  
245 allowing them to find plants by moving toward anything emitting an odor that elicits a strong  
246 antennal signal. This seems unlikely because animals are generally repelled by strong odors

247 (Laing et al., 1978; Semmelhack and Wang, 2009; also, see figures 4-5); we are testing this idea  
248 now (Sun et al, in preparation). Another possibility is that genetically regulated hard-wiring links  
249 antennal lobe projection neurons (PNs) or glomeruli responding to food odors with neuronal  
250 pathways that assign positive valence. This, too, seems unlikely because many locust PNs  
251 distributed around the antennal lobe respond to both food odors and non-food odors (Stopfer et al,  
252 2003; Sun et al, in preparation). Another possibility is that olfactory wiring downstream from the  
253 antennal lobe is shaped during development by volatile components of the food consumed by the  
254 mother and then deposited in egg pods. It is sometimes the case that chemical components of  
255 food, or metabolic products derived from them, function as pheromones (Ignell et al., 2001),  
256 potentially priming development. The diet of mother mice has been shown to influence olfactory  
257 neurodevelopment and odor preference in the newborn (Todrank et al., 2011). This possibility  
258 could be tested in locusts by manipulating the mother's diet or the volatiles present in egg pods.

259 Our results show that even relatively low concentrations of 1-hexanol, a major monomolecular  
260 component of wheat grass that is known to elicit widespread neuronal responses in the locust  
261 olfactory pathway, evokes avoidance behavior in naïve locust hatchlings, while lower  
262 concentrations elicited neither attraction nor avoidance. This result is consistent with earlier  
263 findings in other model systems showing the importance of background odors or odor blends in  
264 determining valence. The black bean aphid, for example, is repelled by many of the individual  
265 volatile compounds of its host plant, though attracted to their blend (Webster et al., 2010). The  
266 Asian tiger mosquito is attracted to human body odor, but not to its individual components (Xie et  
267 al., 2019). And, the moth *Manduca sexta* is not attracted by single or small subsets of components  
268 present in its favored food source, the *Datura wrightii* flower, but it is attracted by larger synthetic  
269 mixtures of its major components (Riffell et al., 2009). Moreover, the odor of the *Datura* flower  
270 combined with that of the leaf of this plant elicits a stronger positive behavioral response than the  
271 floral odor alone (Kárpáti et al., 2013).

272 In mice, odors that separately evoke the same innate valence can evoke the opposite valence  
273 when blended (Qiu et al., 2021), a result consistent with combinatorial rather than labeled-line  
274 processing of valence information. The same logic appears to apply to our study, in which an  
275 innately attractive blend included components that evoked repulsion, suggesting that odors with  
276 innate valence are not necessarily processed by a labeled lines in locusts. Our results are  
277 consistent with earlier work in humans and in *Drosophila* showing that odor valence depends  
278 strongly on concentration (Laing et al., 1978; Semmelhack and Wang, 2009): as the concentration  
279 of an odorant increases, increasing numbers and types of odorant receptors are activated, eliciting  
280 different valence behaviors. Similarly, the convergence of excitatory and inhibitory projections from  
281 different pheromone-sensitive glomeruli in the *Drosophila* lateral horn has given rise to the  
282 suggestion that the balance of attractive and aversive signals may determine sex behaviors  
283 (Jefferis et al., 2007). A similar logic may apply for components of food odor in locusts. Further  
284 experiments testing mixtures of food odor components at different concentrations and mapping the  
285 functional pathways for these odors could help elucidate the neural basis of innate olfactory  
286 behaviors.

287

## 288 **Data Availability**

289 The data underlying this article will be shared on reasonable request to the corresponding author.

## 290 **Funding**

291 This research was supported by an Intramural Grant from NIH-NICHD to M.S.



## 292 **Acknowledgments**

293 We thank NIMH Section on Instrumentation for help with the experimental setup, and members of  
294 the Stopfer lab, especially Zane Aldworth for helpful comments and suggestions. We also thank  
295 Erica Varga for assisting with reviewing some of the data.

## 296 **Conflict of Interest**

297 The authors declare no conflict of interest

298

299

## 300 **References**

- Balogh, René D., Porter, R.H., 1986. Olfactory preferences resulting from mere exposure in human neonates. *Infant Behav. Dev.* 9, 395–401. [https://doi.org/10.1016/0163-6383\(86\)90013-5](https://doi.org/10.1016/0163-6383(86)90013-5)
- Eissa, H.A., Yaseen, A.A., Bareh, G.F., Ibrahim, W.A., Mansour, A.F., 2018. Enhancing Aroma Flavor, Bio-Active Constituents and Quality Attributes of Cantaloupe Juice Supplementing with Wheat Grass Juice. *J. Biological Sciences* 18, 1–12. <https://doi.org/10.3923/jbs.2018.1.12>
- Hudson, R., 1985. Do newborn rabbits learn the odor stimuli releasing nipple-search behavior? *Dev. Psychobiol.* 18, 575–585. <https://doi.org/10.1002/dev.420180612>
- Ignell, R., Couillaud, F., Anton, S., 2001. Juvenile-hormone-mediated plasticity of aggregation behaviour and olfactory processing in adult desert locusts. *J. Exp. Biol.* 204, 249–259. <https://doi.org/10.1242/jeb.204.2.249>
- Jefferis, G.S.X.E., Potter, C.J., Chan, A.M., Marin, E.C., Rohlfsing, T., Maurer, C.R., Luo, L., 2007. Comprehensive Maps of *Drosophila* Higher Olfactory Centers: Spatially Segregated Fruit and Pheromone Representation. *Cell* 128, 1187–1203. <https://doi.org/10.1016/j.cell.2007.01.040>
- Kárpáti, Z., Knaden, M., Reinecke, A., Hansson, B.S., 2013. Intraspecific Combinations of Flower and Leaf Volatiles Act Together in Attracting Hawkmoth Pollinators. *PLOS ONE* 8, e72805. <https://doi.org/10.1371/journal.pone.0072805>
- Keil, T.A., 1999. Morphology and Development of the Peripheral Olfactory Organs, in: Hansson, B.S. (Ed.), *Insect Olfaction*. Springer, Berlin, Heidelberg, pp. 5–47. [https://doi.org/10.1007/978-3-662-07911-9\\_2](https://doi.org/10.1007/978-3-662-07911-9_2)
- Laing, D.G., Panhuber, H., Baxter, R.I., 1978. Olfactory properties of Amines and n-Butanol. *Chem. Senses* 3, 149–166. <https://doi.org/10.1093/chemse/3.2.149>
- Qiu, Q., Wu, Y., Ma, L., Yu, C.R., 2021. Encoding innately recognized odors via a generalized population code. *Curr. Biol.* 31, 1813–1825.e4. <https://doi.org/10.1016/j.cub.2021.01.094>
- Ray, S., Stopfer, M.A., 2022. Argos: A toolkit for tracking multiple animals in complex visual environments. *Methods Ecol. Evol.* 13, 585–595. <https://doi.org/10.1111/2041-210X.13776>
- Riffell, J.A., Lei, H., Christensen, T.A., Hildebrand, J.G., 2009. Characterization and Coding of Behaviorally Significant Odor Mixtures. *Curr. Biol.* 19, 335–340.

<https://doi.org/10.1016/j.cub.2009.01.041>

- Schaal, B., Coureaud, G., Langlois, D., Giniès, C., Sémon, E., Perrier, G., 2003. Chemical and behavioural characterization of the rabbit mammary pheromone. *Nature* 424, 68–72. <https://doi.org/10.1038/nature01739>
- Schleidt, M., Genzel, C., 1990. The significance of mother's perfume for infants in the first weeks of their life. *Ethol. Sociobiol.* 11, 145–154. [https://doi.org/10.1016/0162-3095\(90\)90007-S](https://doi.org/10.1016/0162-3095(90)90007-S)
- Schultheiss, P., Wystrach, A., Lihoreau, M., Schwarz, S., 2020. Insect Navigation, in: Vonk, J., Shackelford, T. (Eds.), *Encyclopedia of Animal Cognition and Behavior*. Springer International Publishing, Cham, pp. 1–8. [https://doi.org/10.1007/978-3-319-47829-6\\_1120-1](https://doi.org/10.1007/978-3-319-47829-6_1120-1)
- Semmelhack, J.L., Wang, J.W., 2009. Select *Drosophila glomeruli* mediate innate olfactory attraction and aversion. *Nature* 459, 218–223. <https://doi.org/10.1038/nature07983>
- Stocker, R.F., 2008. Design of the Larval Chemosensory System, in: Technau, G.M. (Ed.), *Brain Development in Drosophila Melanogaster*, *Advances in Experimental Medicine and Biology*. Springer, New York, NY, pp. 69–81. [https://doi.org/10.1007/978-0-387-78261-4\\_5](https://doi.org/10.1007/978-0-387-78261-4_5)
- Stopfer, M., Jayaraman, V., Laurent, G., 2003. Intensity versus identity coding in an olfactory system. *Neuron* 39, 991–1004. <https://doi.org/10.1016/j.neuron.2003.08.011>
- Todrank, J., Heth, G., Restrepo, D., 2011. Effects of in utero odorant exposure on neuroanatomical development of the olfactory bulb and odour preferences. *Proc. R. Soc. B Biol. Sci.* 278, 1949–1955. <https://doi.org/10.1098/rspb.2010.2314>
- Torto, B., Njagi, P.G.N., Hassanali, A., Amiani, H., 1996. Aggregation pheromone system of nymphal gregarious desert locust, *Schistocerca gregaria* (forskål). *J. Chem. Ecol.* 22, 2273–2281. <https://doi.org/10.1007/BF02029546>
- Webster, B., Bruce, T., Pickett, J., Hardie, J., 2010. Volatiles functioning as host cues in a blend become nonhost cues when presented alone to the black bean aphid. *Anim. Behav.* 79, 451–457. <https://doi.org/10.1016/j.anbehav.2009.11.028>
- Xie, L., Yang, W., Liu, H., Liu, T., Xie, Y., Lin, F., Zhou, G., Zhou, X., Wu, K., Gu, J., Yan, G., Chen, X.-G., 2019. Enhancing attraction of the vector mosquito *Aedes albopictus* by using a novel synthetic odorant blend. *Parasit. Vectors* 12, 382. <https://doi.org/10.1186/s13071-019-3646-x>

## 301 Figure legends

302 **Figure 1:** (a) Experimental setup for testing odor preference in insects; (b) and (c) normalized  
303 odorant concentration measured by a mini PID at different locations of the arena when delivered  
304 through the left and the right port, respectively. (d) Technique for collecting hatchlings without  
305 touching them.

306  
307 **Figure 2:** (a) Overlaid tracks of all hatchlings in test of attraction toward wheat grass juice.  
308 Purple/dark blue – early part of the track, light green/yellow – late part of the track. Portions of  
309 tracks within ROI marked in black, orange arrow heads indicate hatchlings crossing into the ROI  
310 around grass juice and magenta arrow heads indicate hatchlings crossing into the ROI around  
311 control. (b) Hatchlings stay within the ROI around grass juice (orange) longer than that around  
312 control (blue). (c) The number of entries into the odor ROI is also larger than control, indicating that  
313 the hatchlings cross into it more often. (d) Kaplan-Meier survival plot, where events are defined as  
314 first entries into the ROI around odor (orange) or control (blue), shows hatchlings quickly head  
315 toward the odor port.

316  
317 **Figure 3:** Hatchlings with their antennae removed do not show any difference in attraction towards  
318 grass juice odor and control. (a) Overlaid tracks from all hatchlings tested; notably, some, lacking  
319 antennae, walked in circular patterns. (b) Stay time in control ROI and odor ROI, (c) number of  
320 entries into control ROI and odor ROI. Control experiments revealed that anesthesia by cooling  
321 does not in itself affect odor preference and navigation to a preferred odor source when antennae  
322 are intact: (d) overlaid tracks of all the hatchlings from these control experiments, (e) stay time in  
323 control ROI and odor ROI; results fell just short of statistical significance, (f) number of entries into  
324 control ROI and odor ROI.

325  
326 **Figure 4:** Naive hatchlings avoid 1-hexanol (a) Overlaid tracks of hatchlings tested for affinity  
327 towards 1% 1-hexanol compared to mineral oil. (b) Stay-time of hatchlings in the ROI around 1-  
328 hexanol compared to that around control. (c) Number of ROI entries. (d) Overlaid tracks of  
329 hatchlings tested with 0.1% 1-hexanol. (e) The stay-time in the odor ROI was not significantly  
330 different from that around control. (f) Number of ROI entries did not show significant difference  
331 between odor and control, either.

332  
333 **Figure 5:** Naive hatchlings avoid a high concentration of hexanal but are attracted to a lower  
334 concentration. (a) Overlaid tracks for 0.9% hexanal, (b) comparison of stay times in the ROIs, and  
335 (c) number of entries into the ROIs. (d) Tracks for 0.225% hexanal, and comparison of (e) stay  
336 times and (f) number of ROI-entries.

337  
338 **Figure 6:** Control experiment comparing attraction to mineral oil to desiccated, filtered air. (a)  
339 Overlaid tracks of all the hatchlings, (b) comparison of stay time in the ROIs, and (c) comparison of  
340 the number of ROI entries. None of these measures showed any significant differences between  
341 filtered, desiccated air and mineral oil.

342  
343

344

Ray et al Figure 1

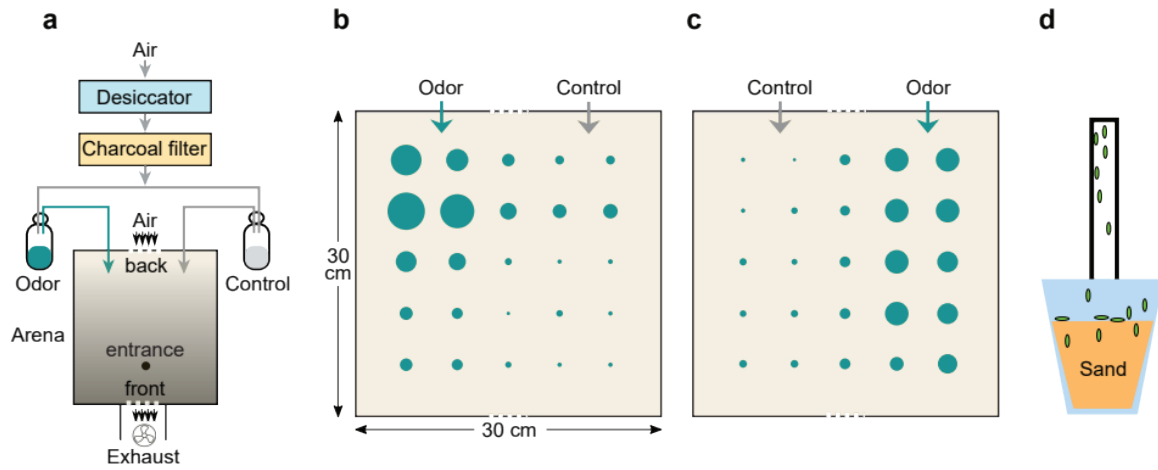

345

346

347

Ray et al Figure 2

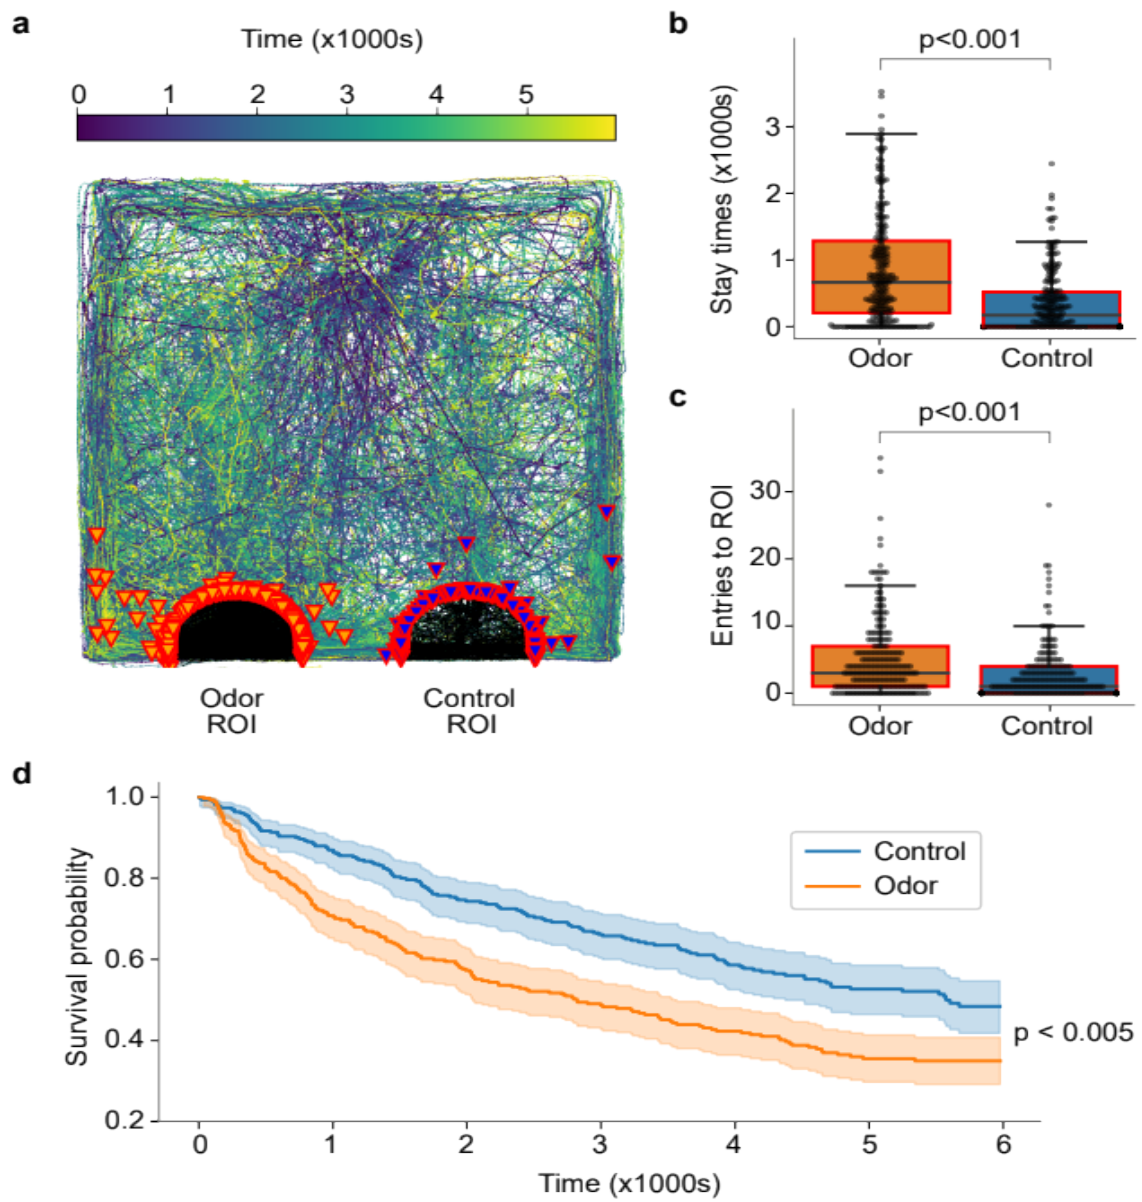

348  
349  
350

Ray et al Figure 3

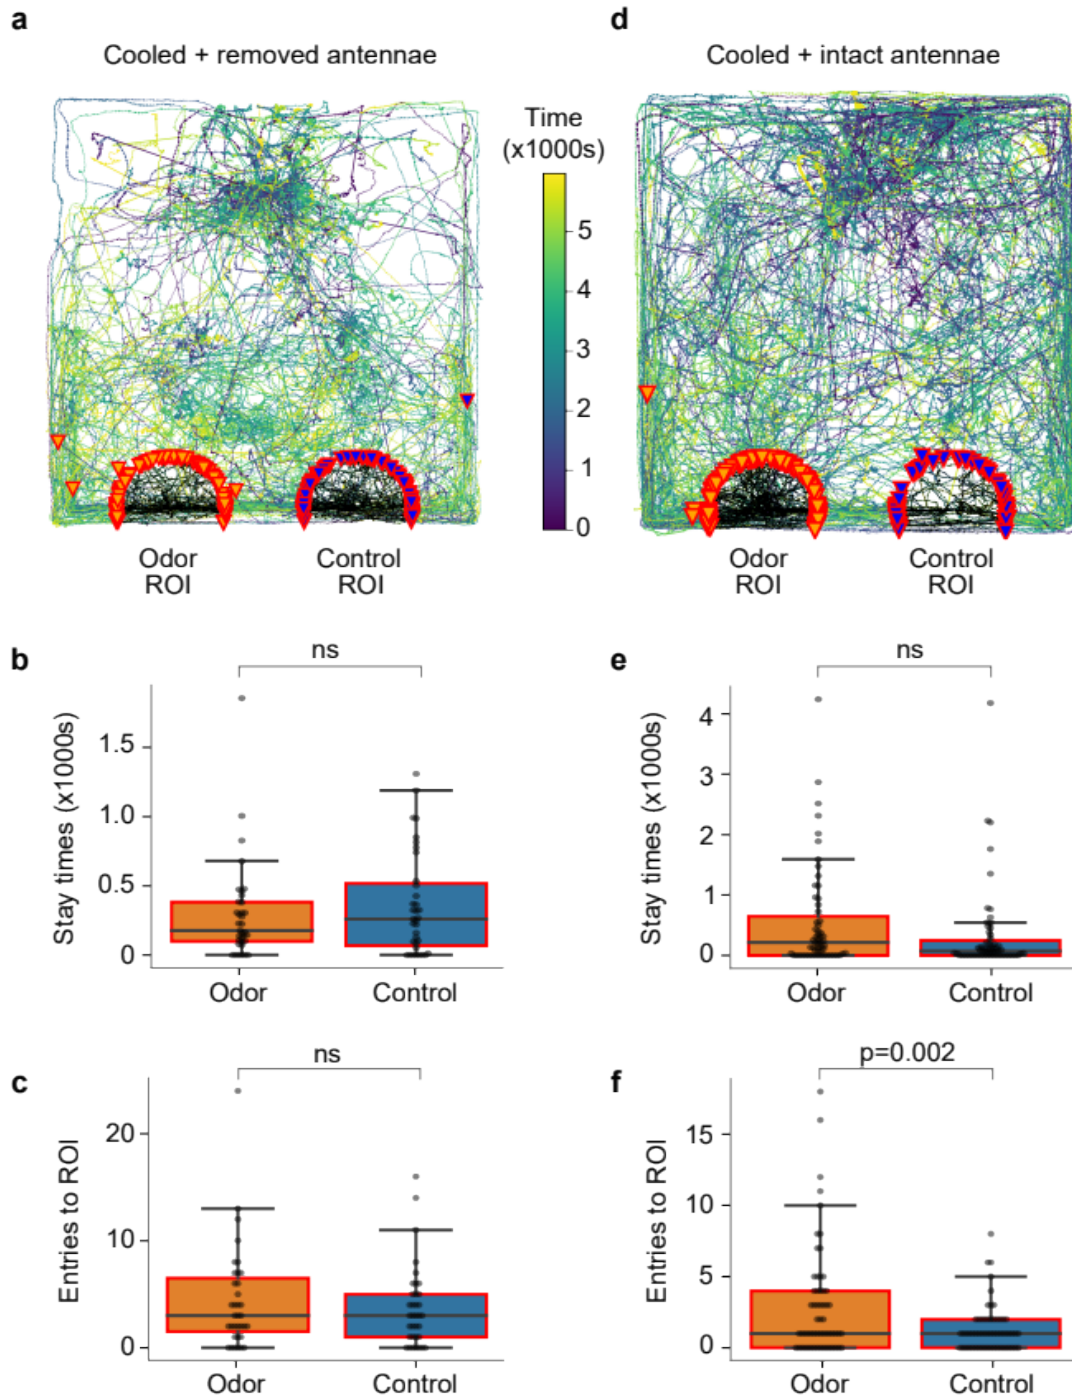

351  
352  
353  
354



Ray et al Figure 4

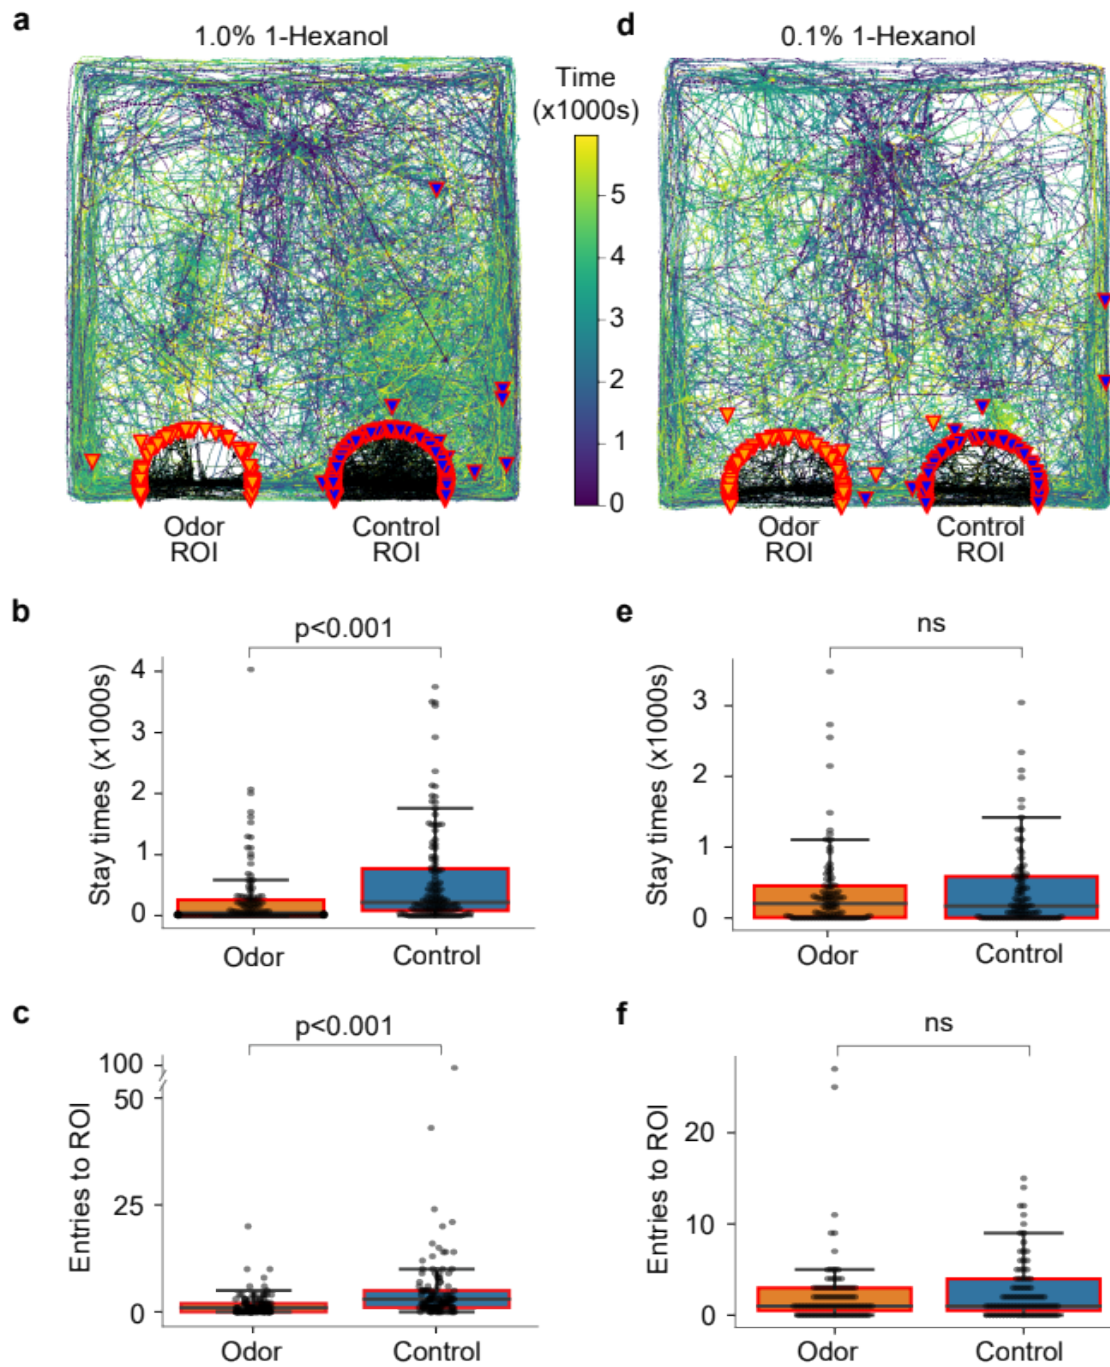

Ray et al Figure 5

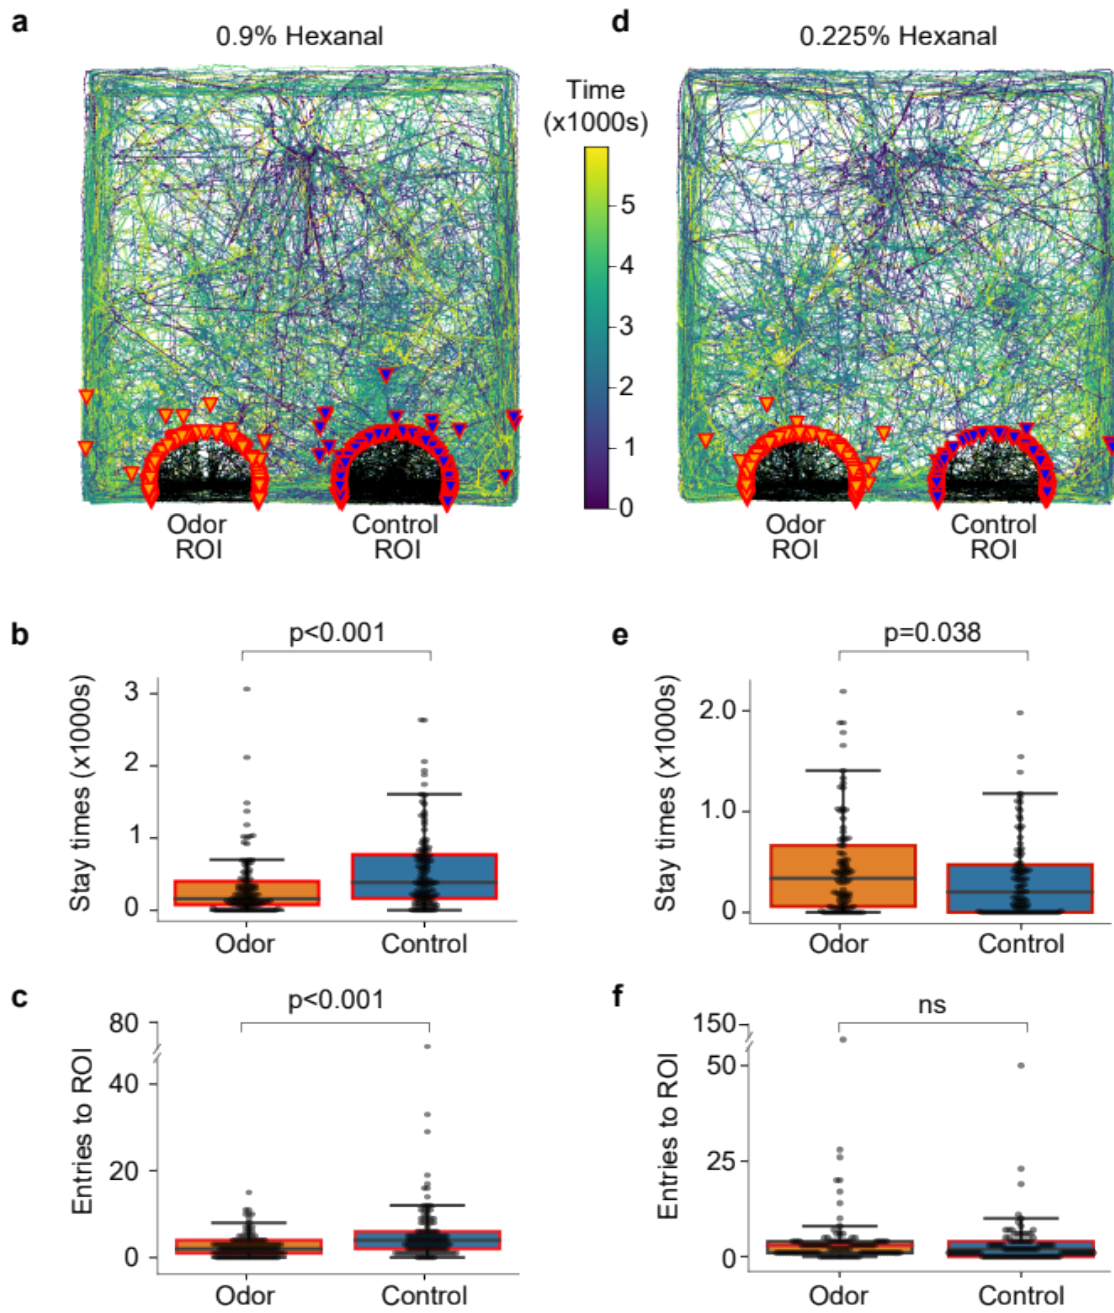

Ray et al Figure 6

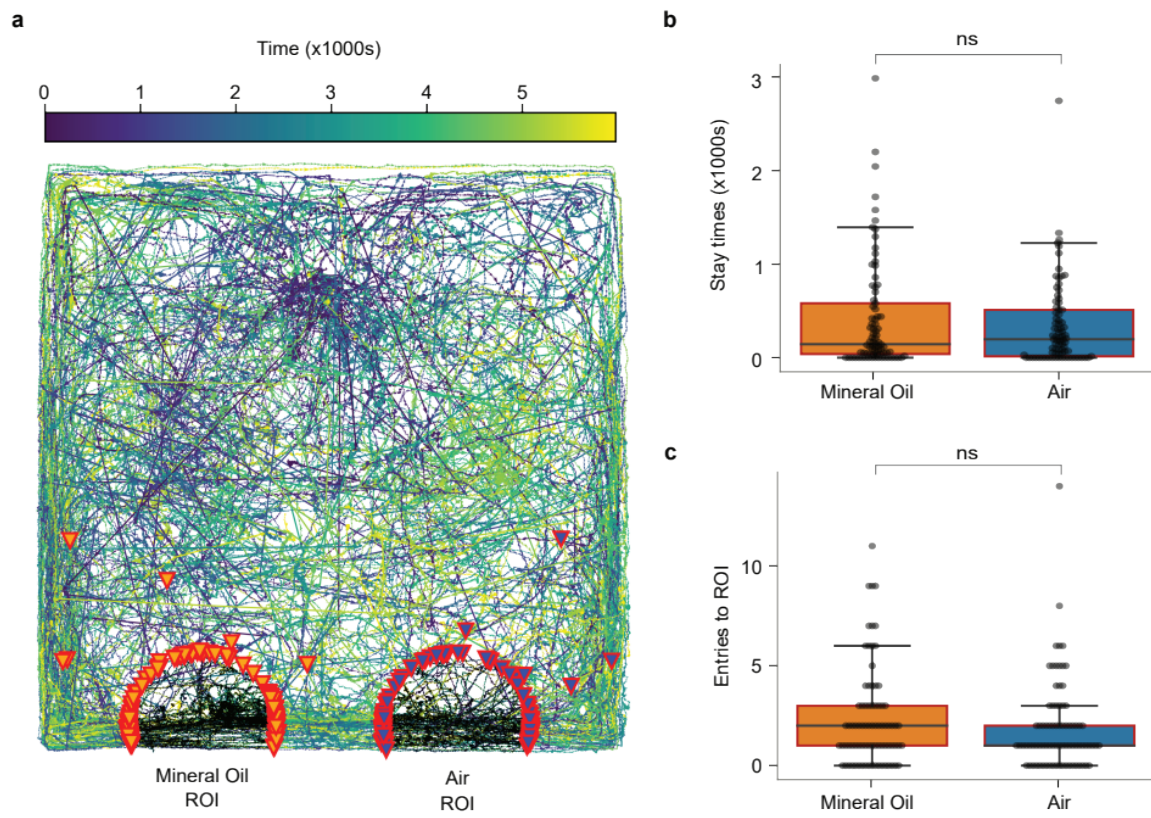

358  
359



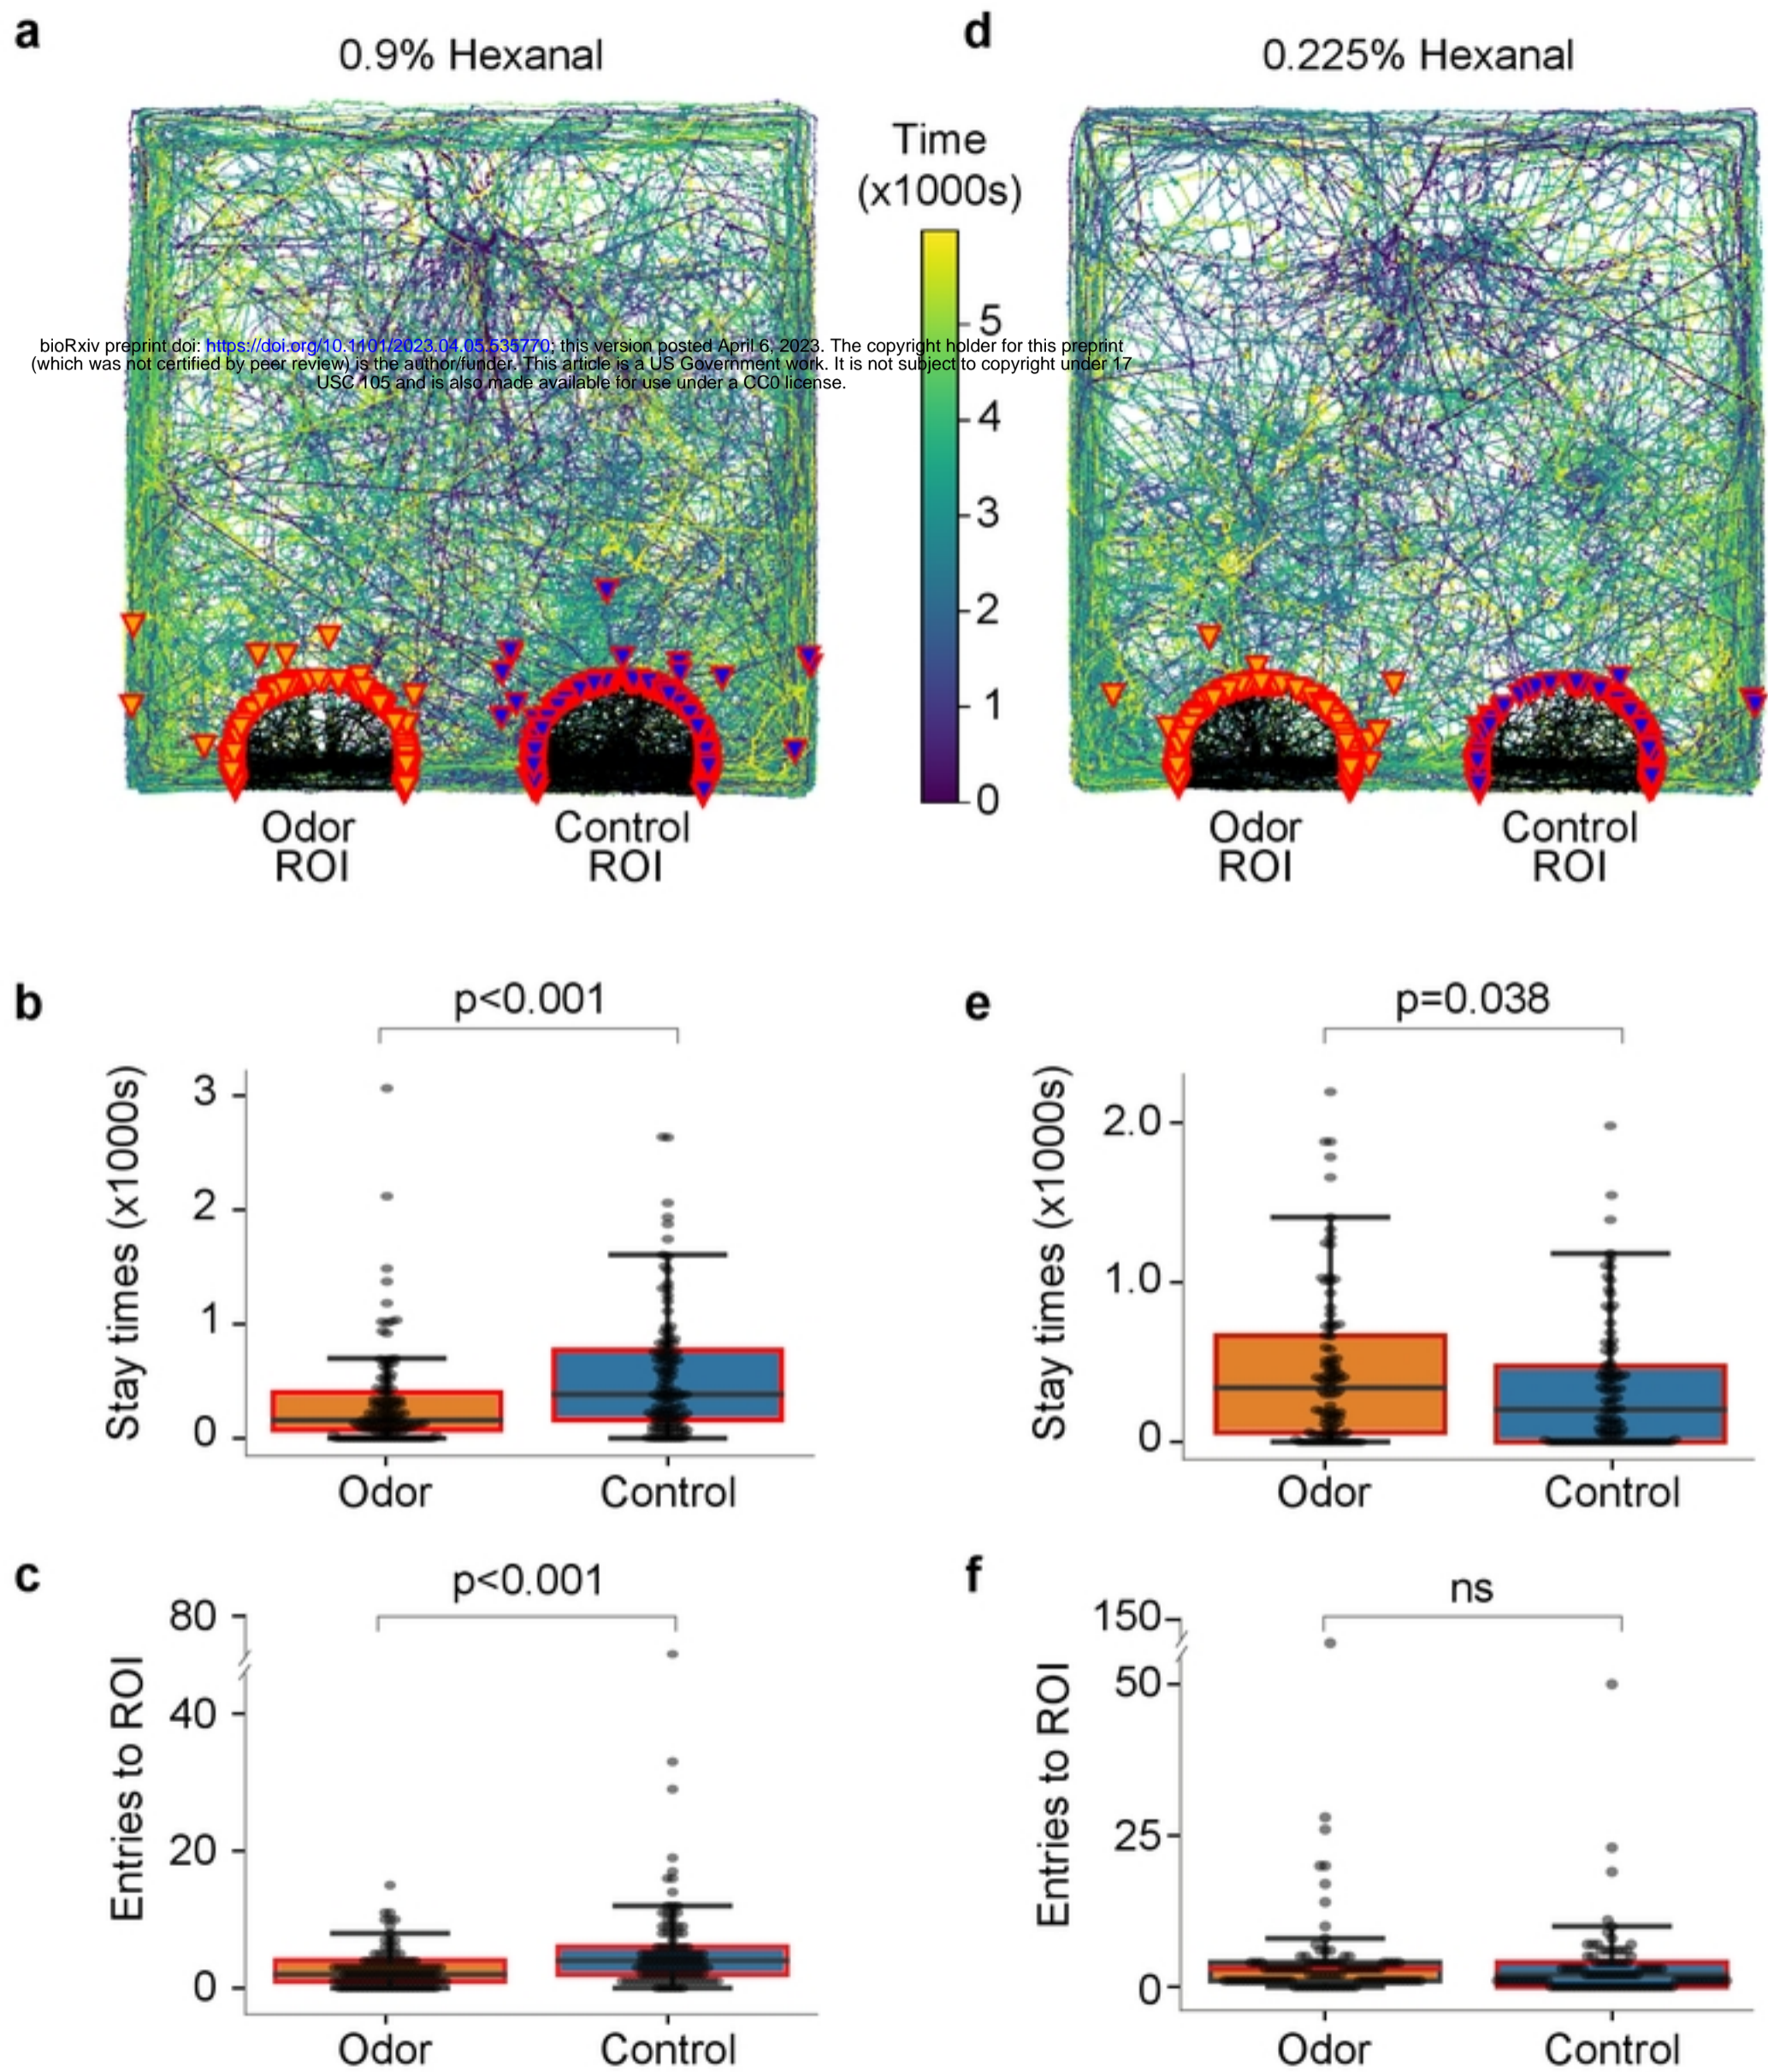

Figure 5



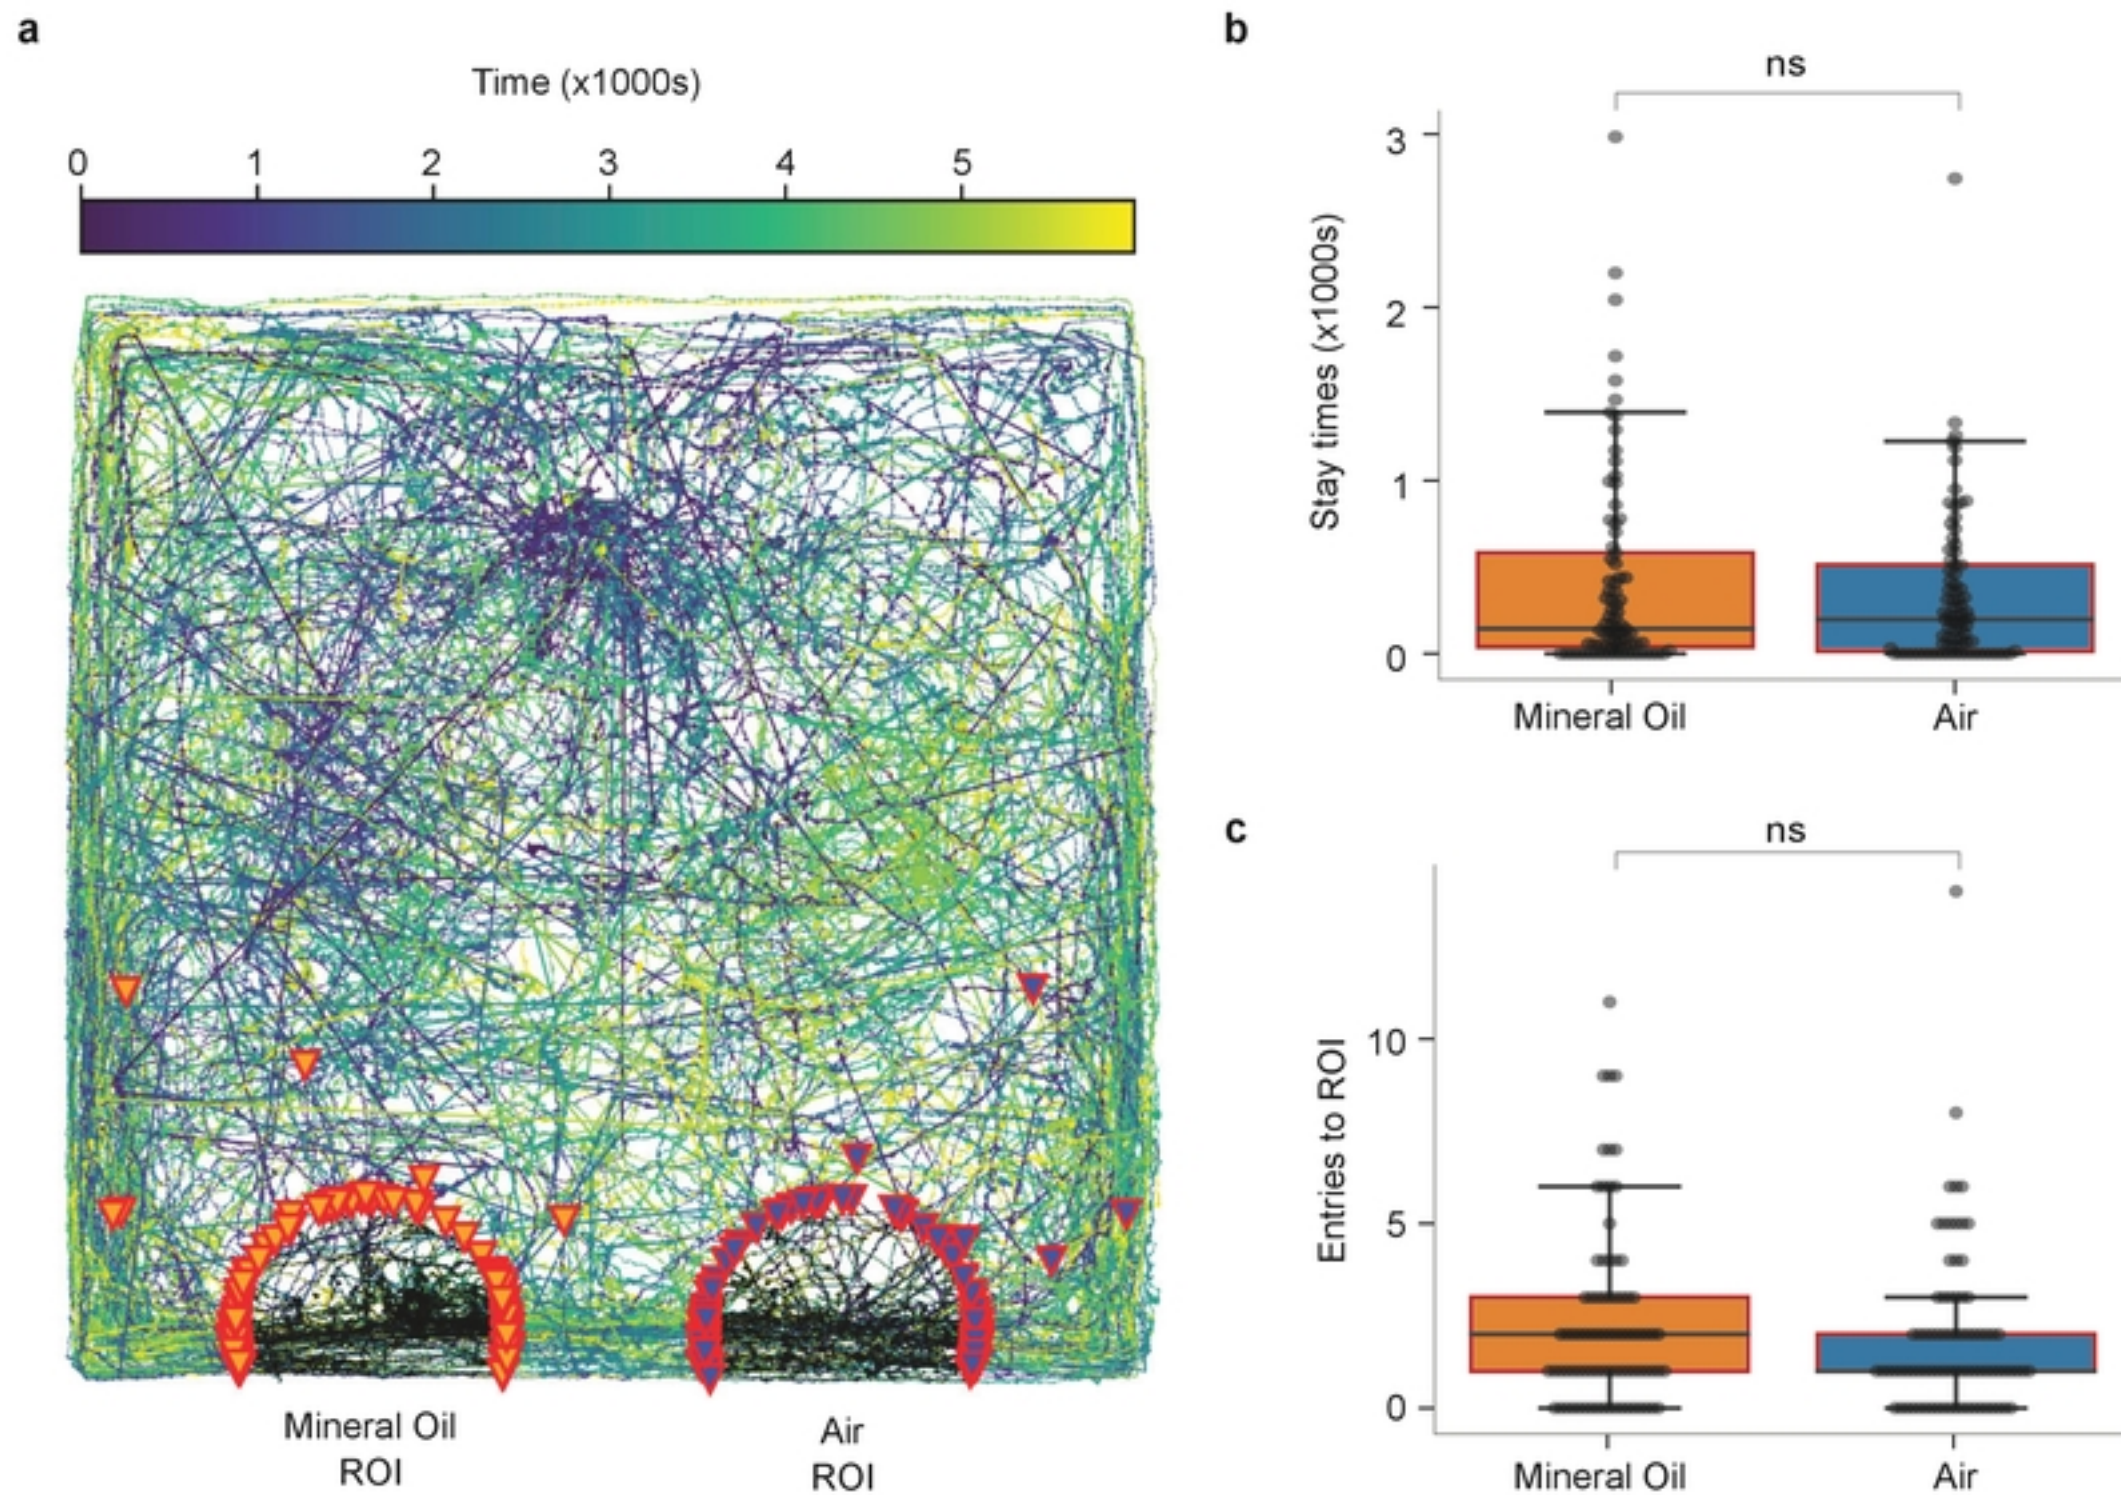

Figure 6

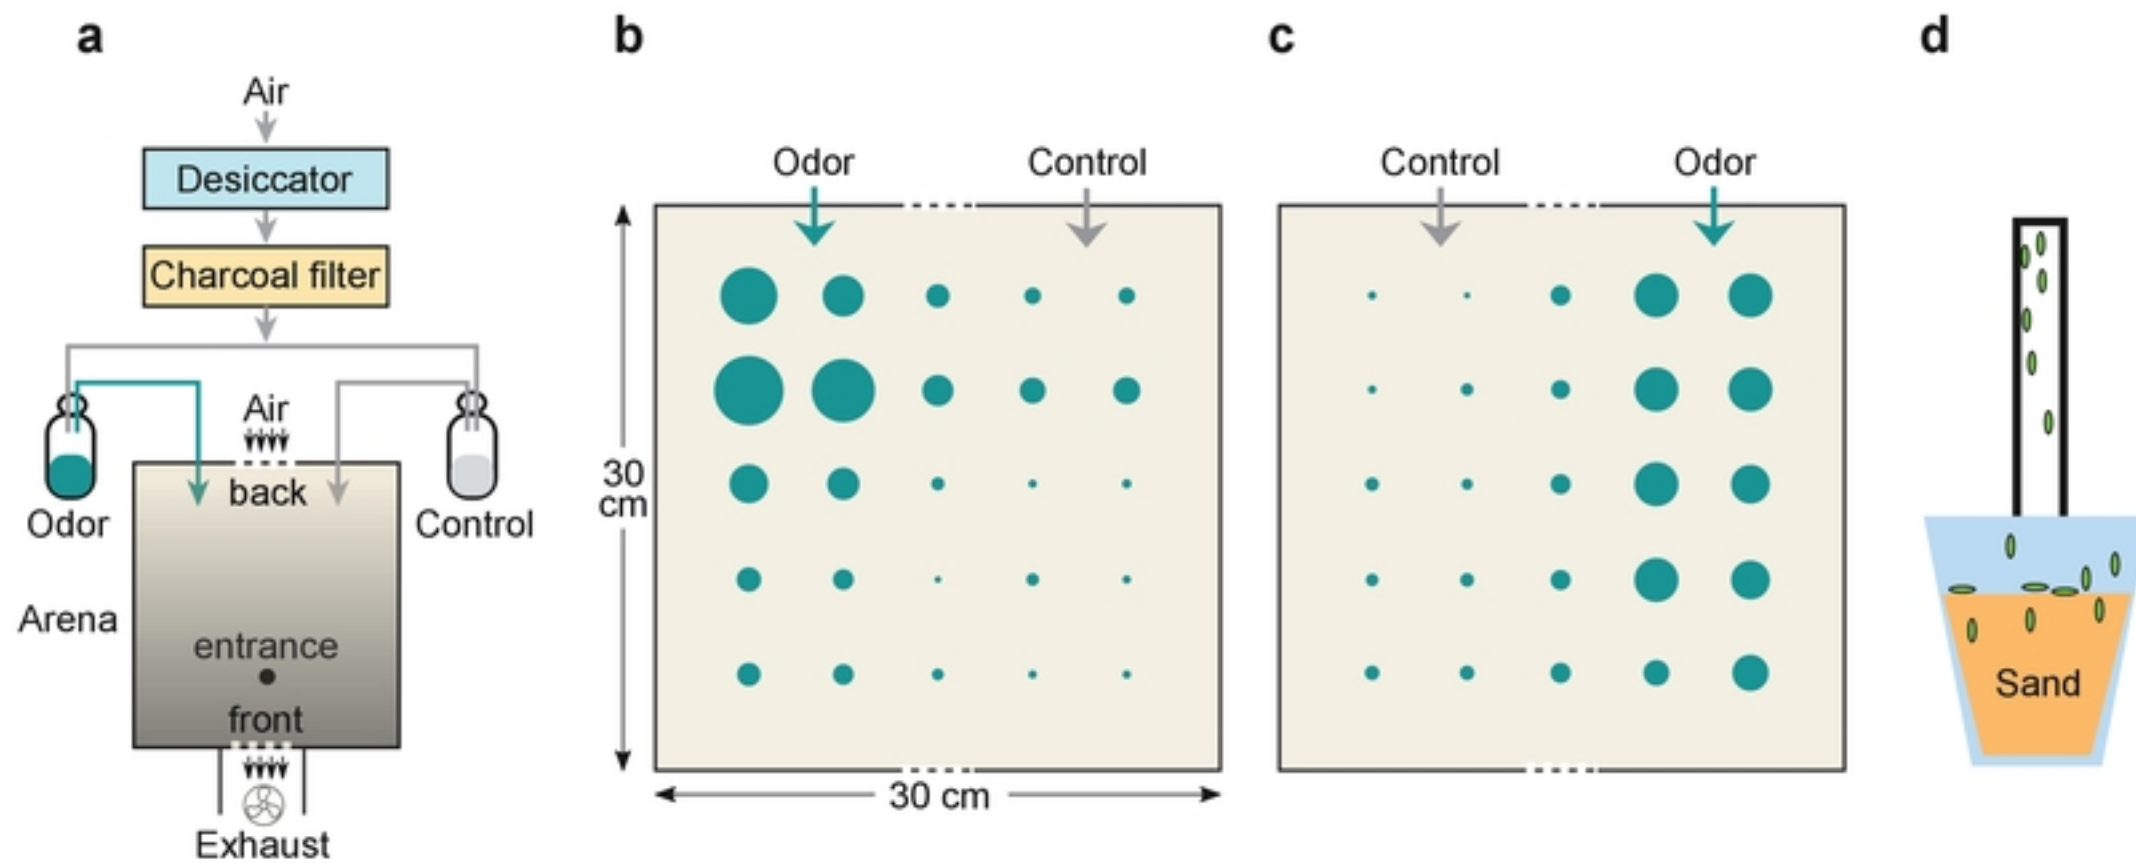

Figure 1



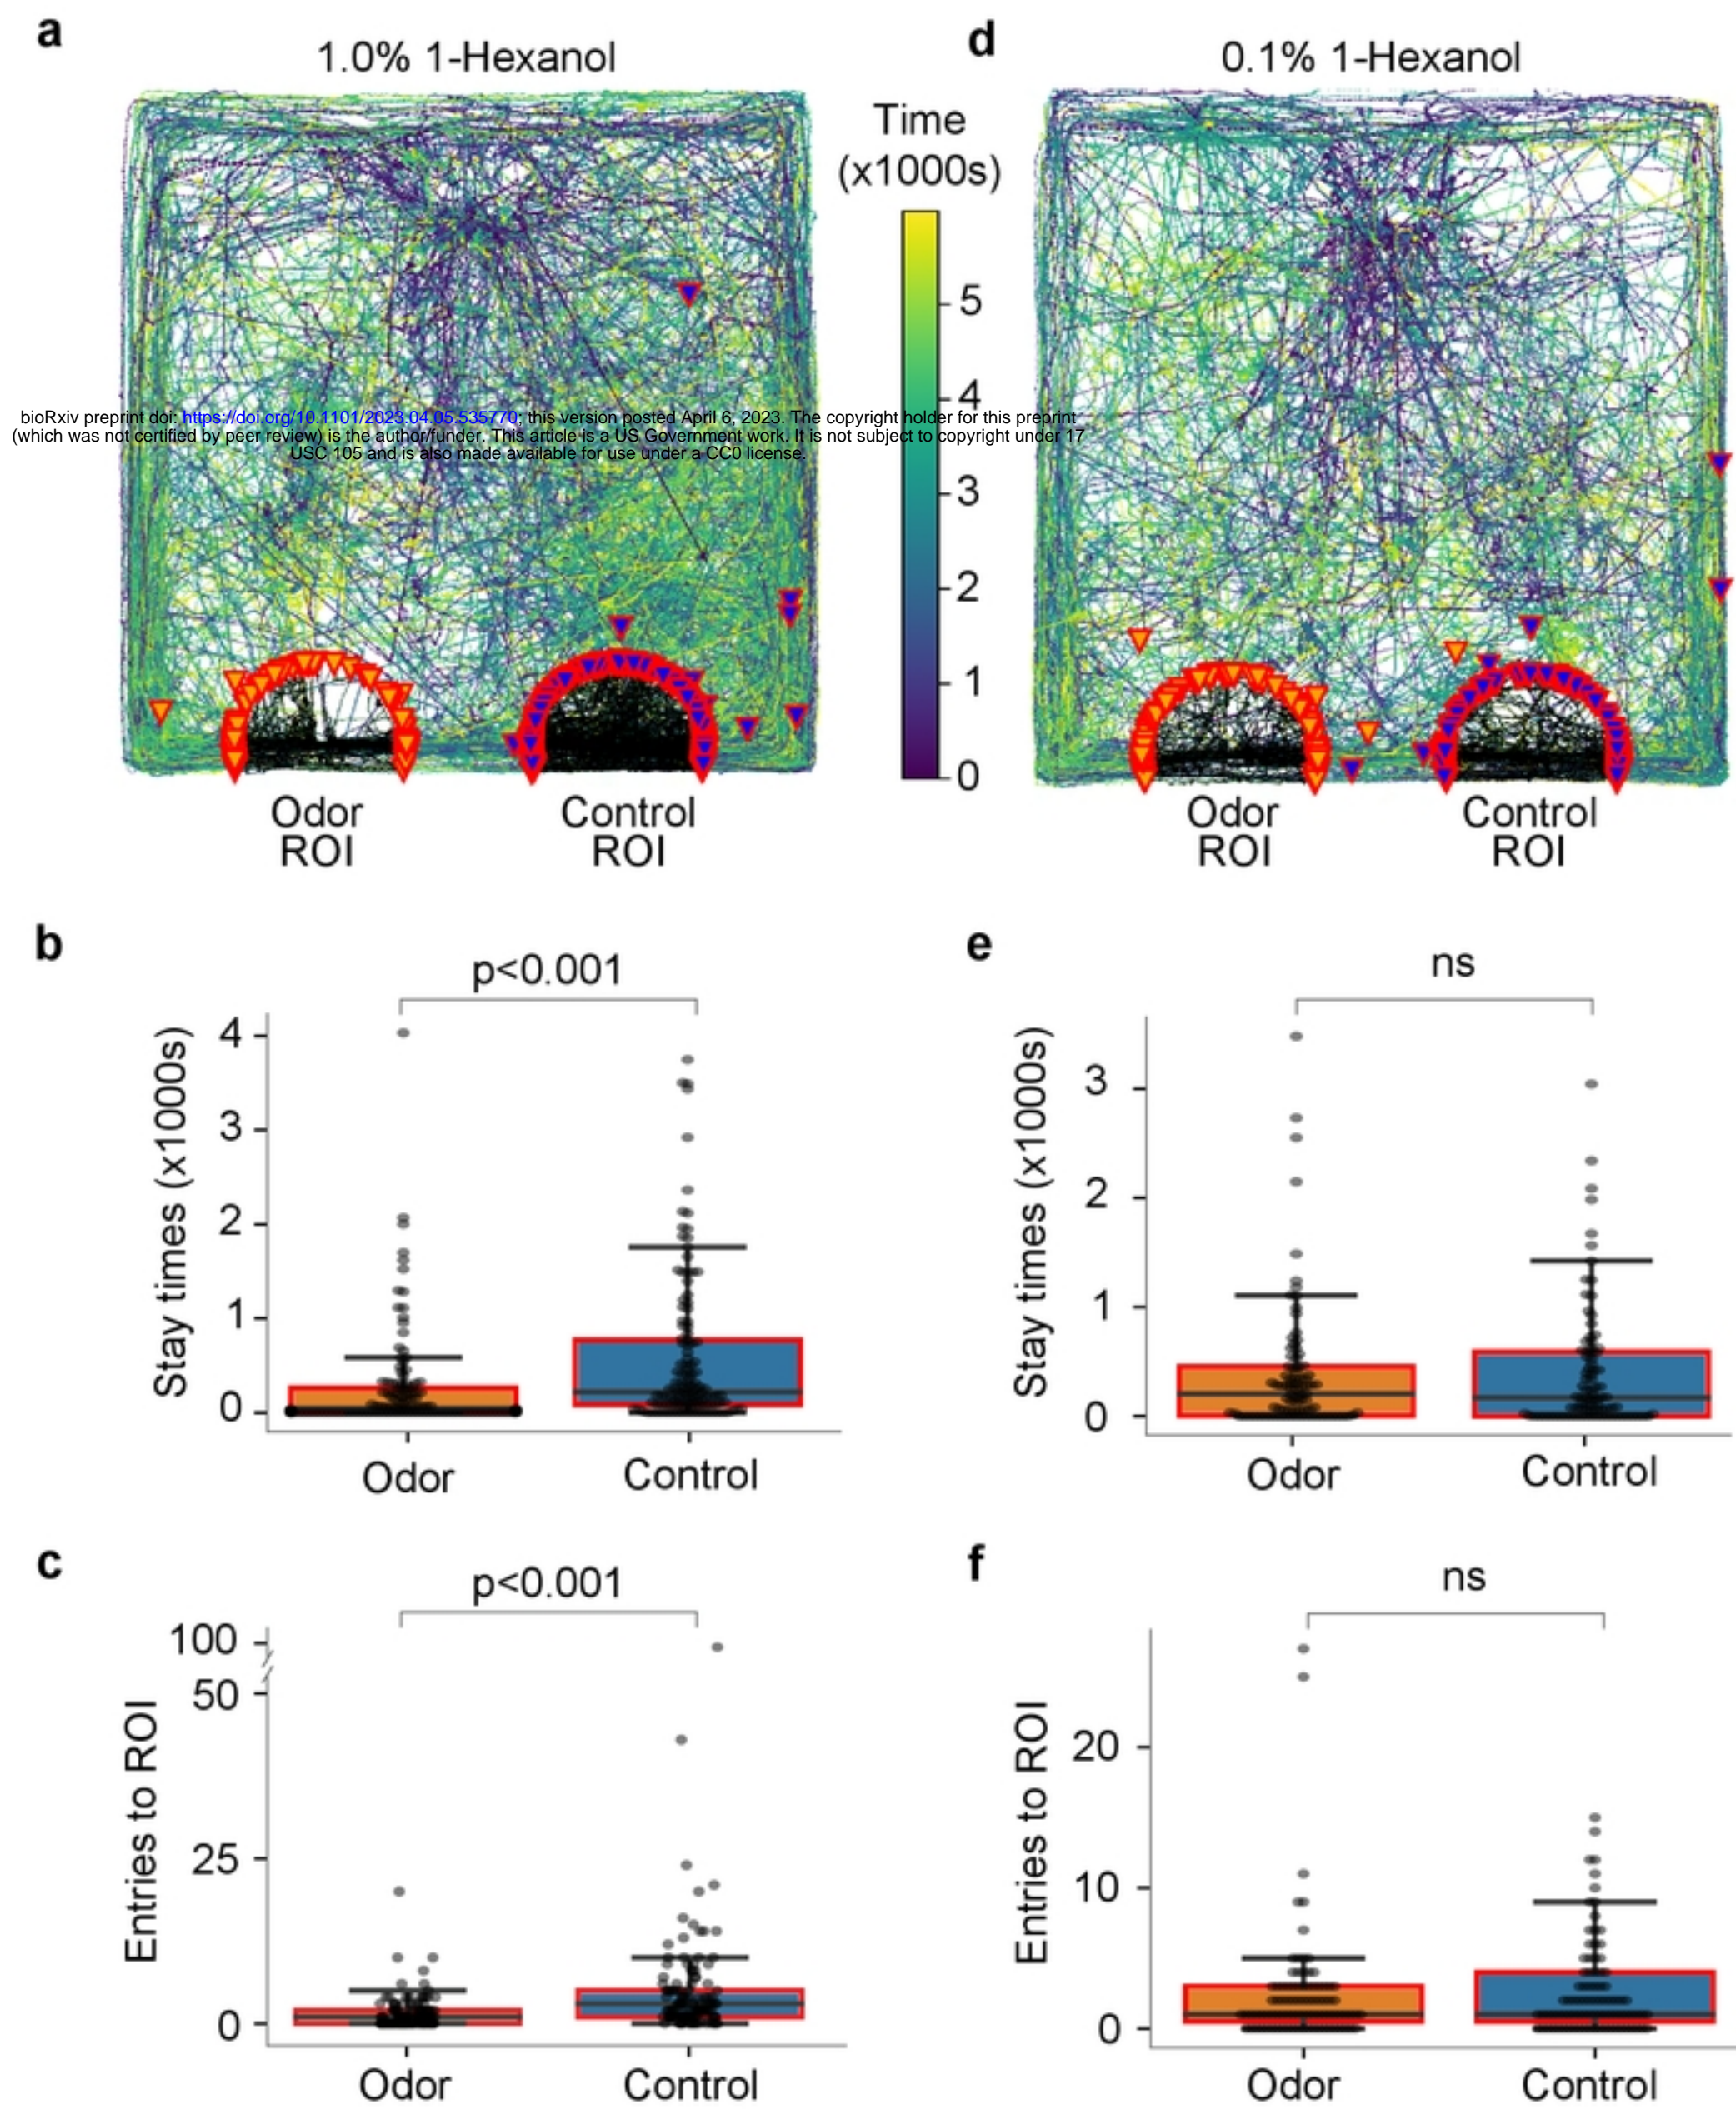

Figure 4



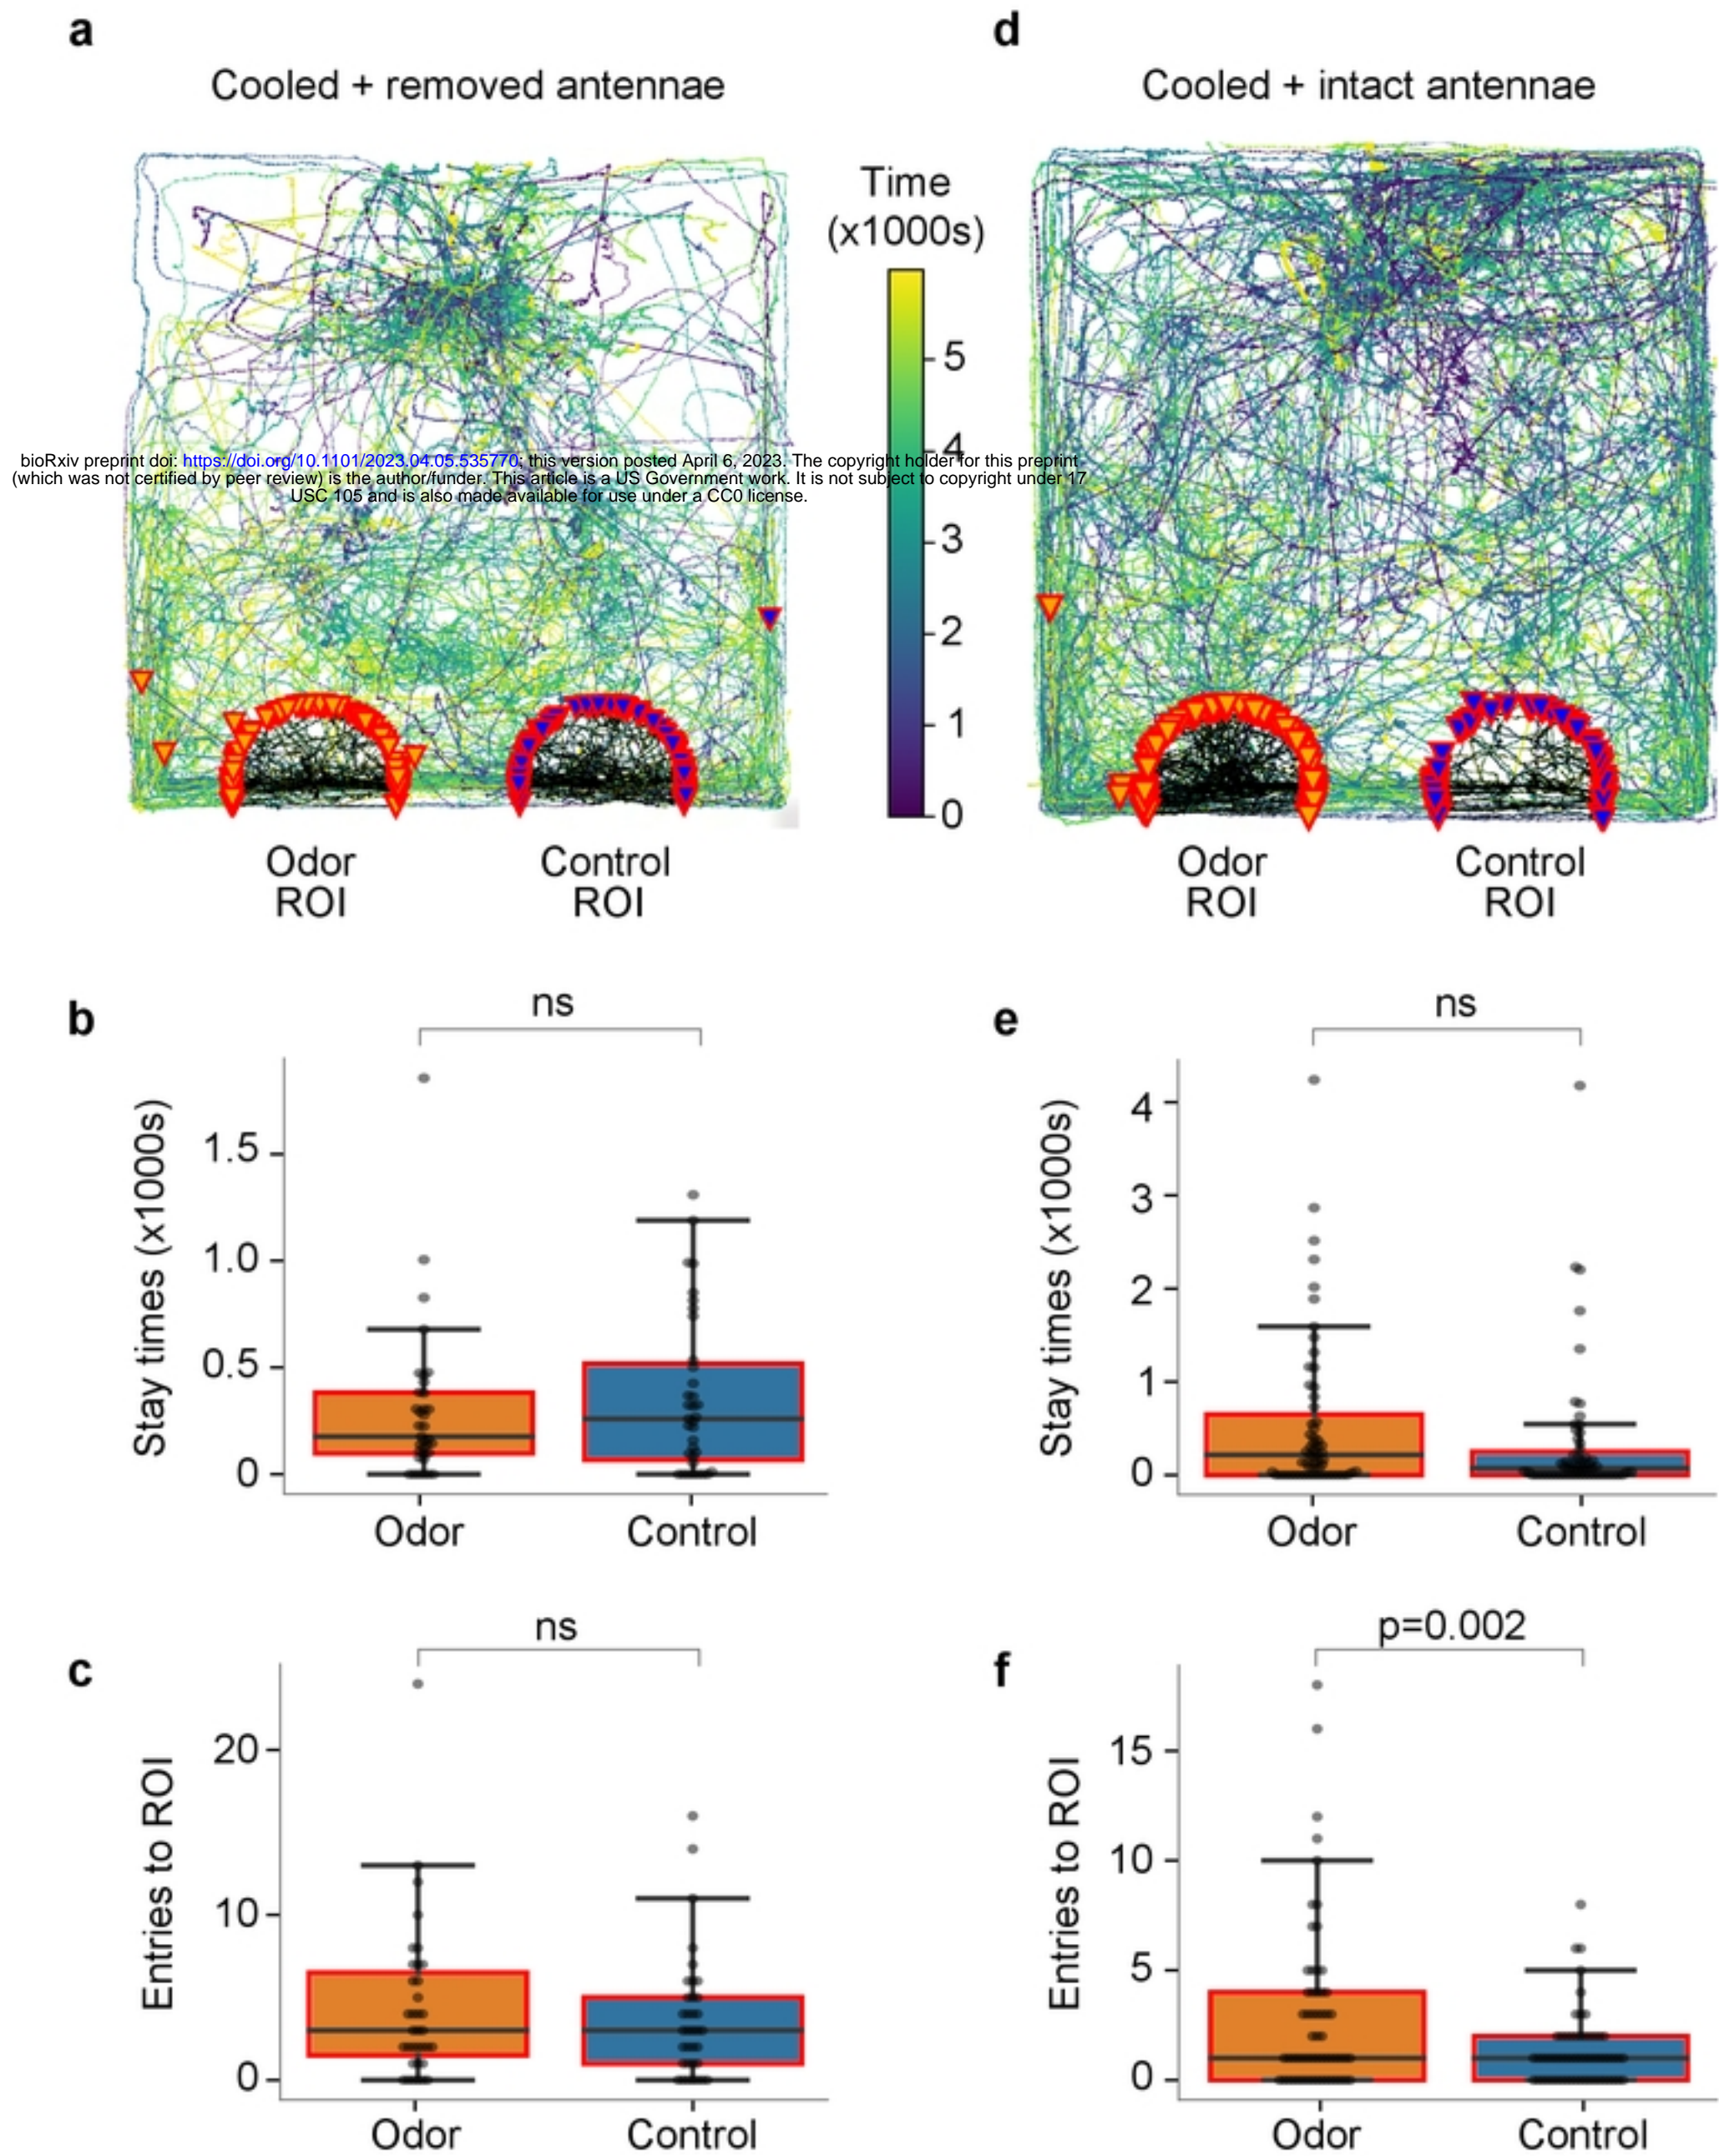

Figure 3



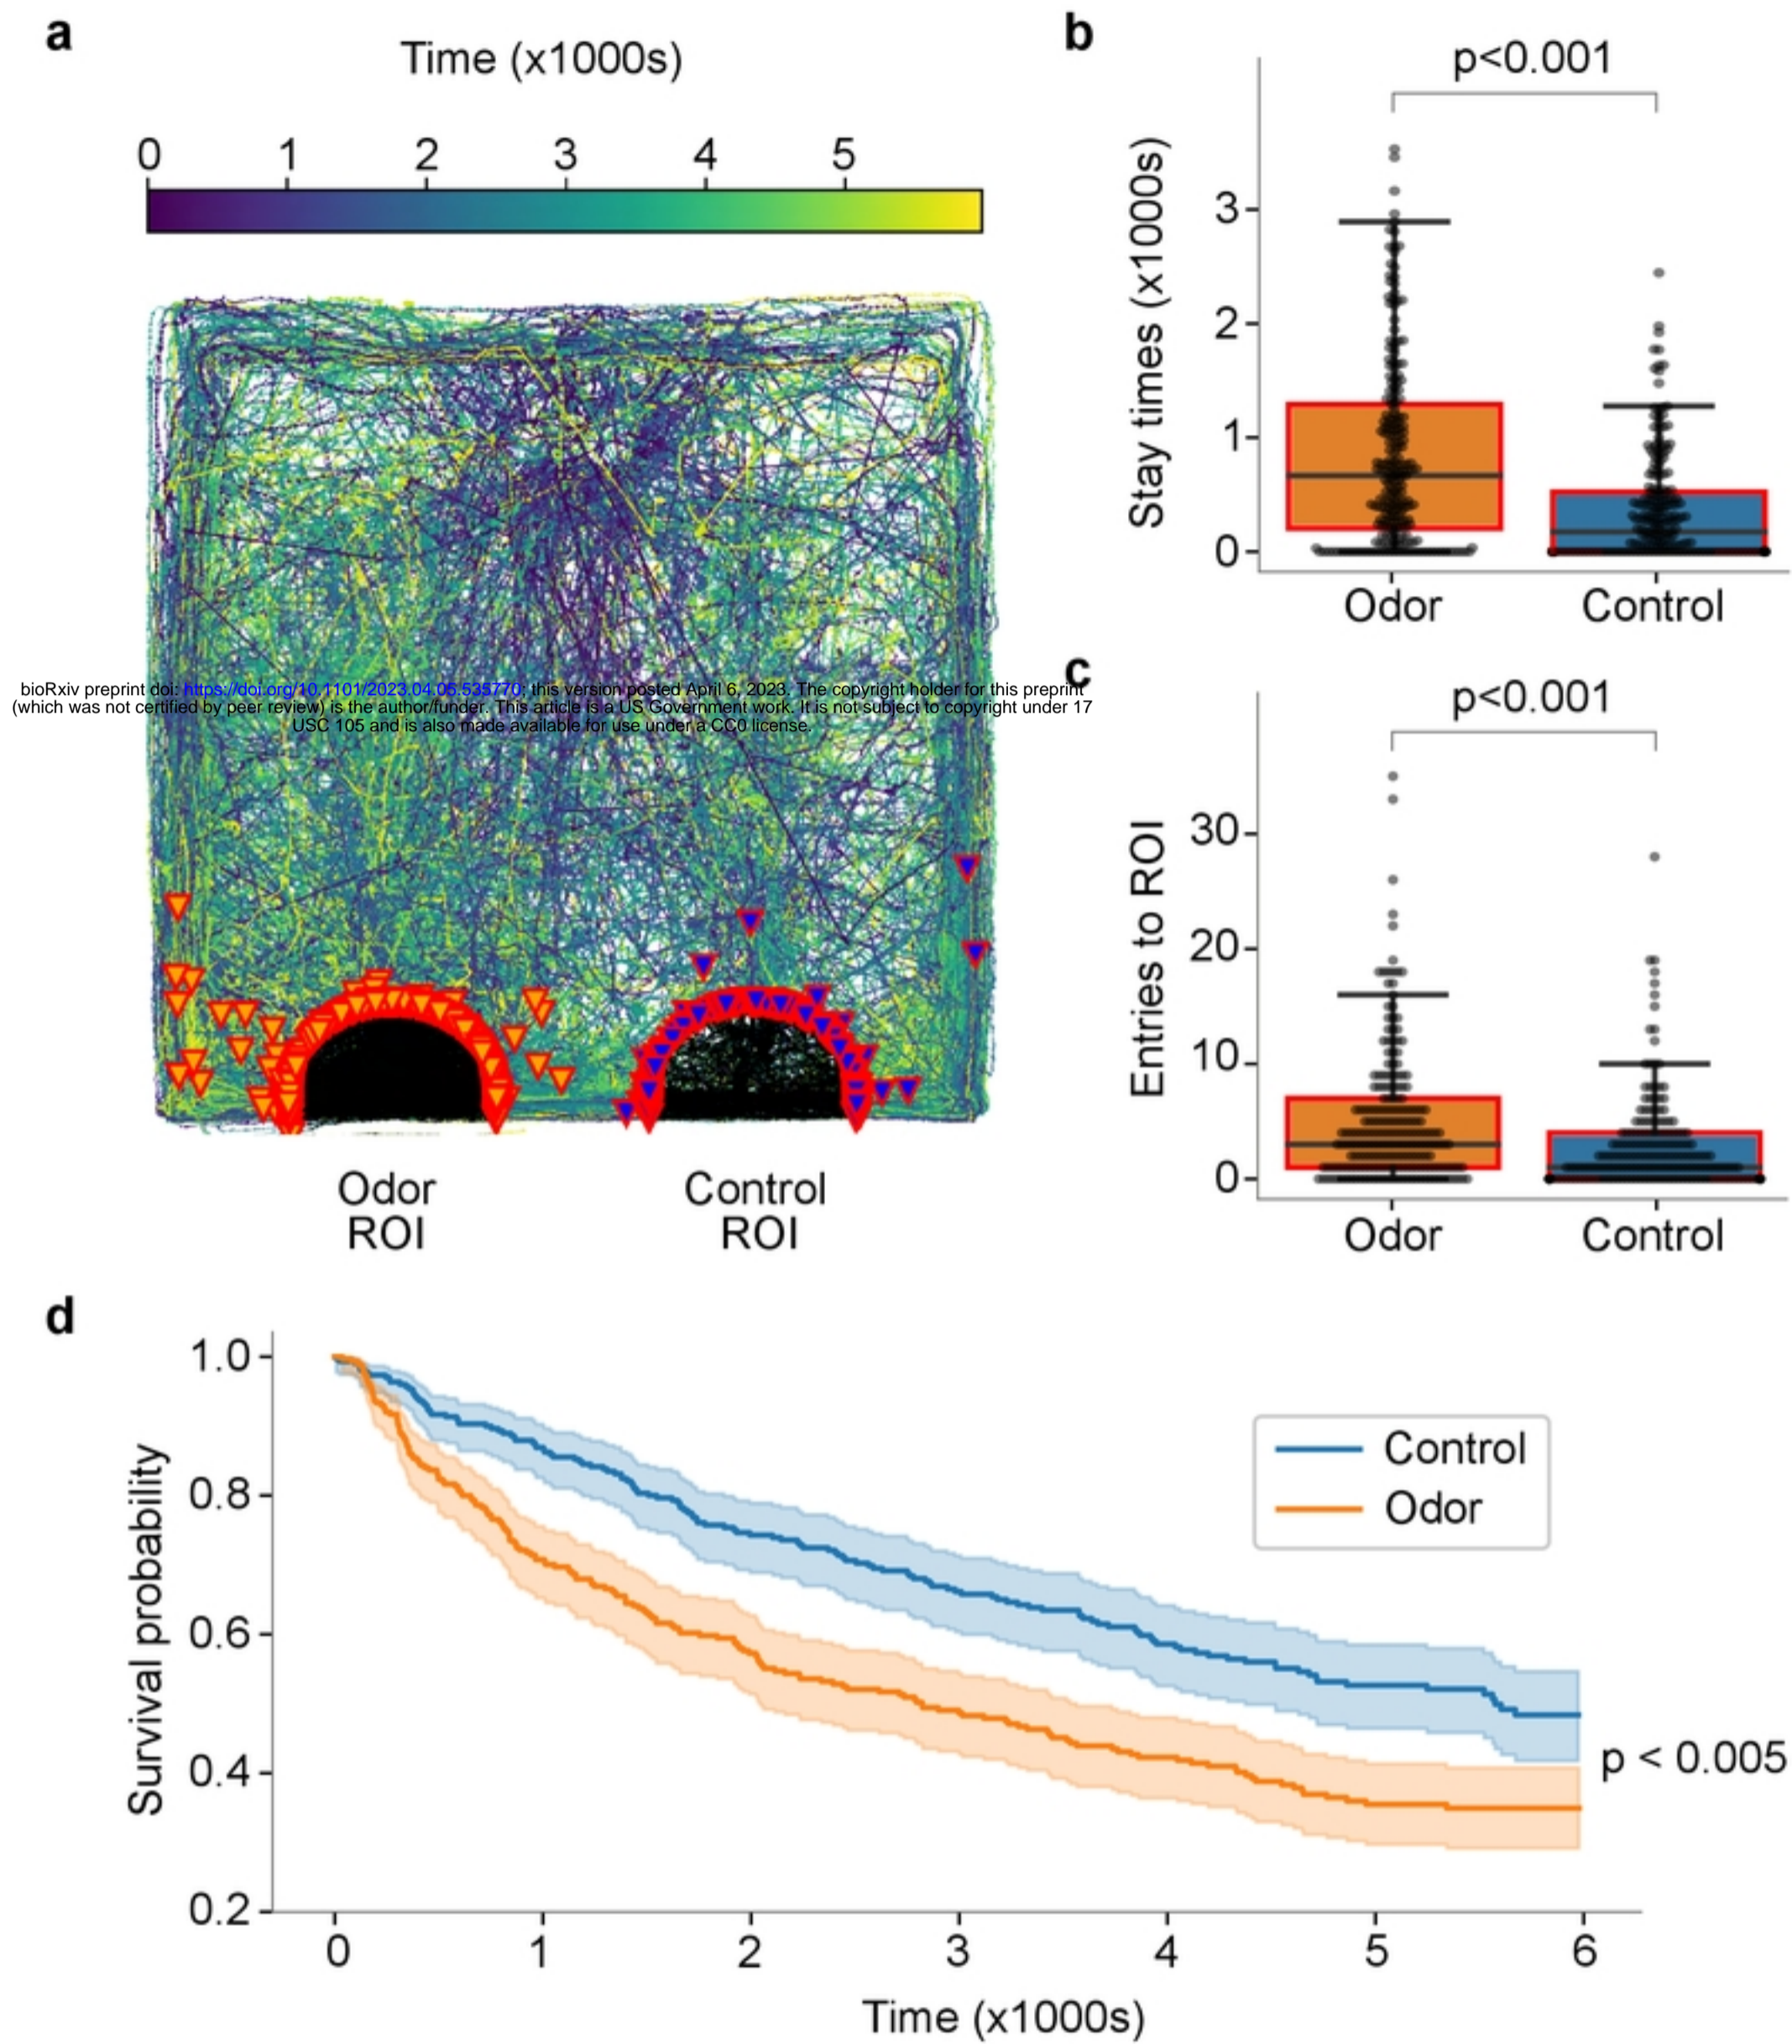

Source: https://www.biorxiv.org/content/10.1101/2023.04.05.535770v1.full.pdf
